# Supplementary material
Source: publisher figshare collection journal article supplement (https://frontiersin.figshare.com/ndownloader/files/23354648)
Supplement: Supplementary file [file 23354648]

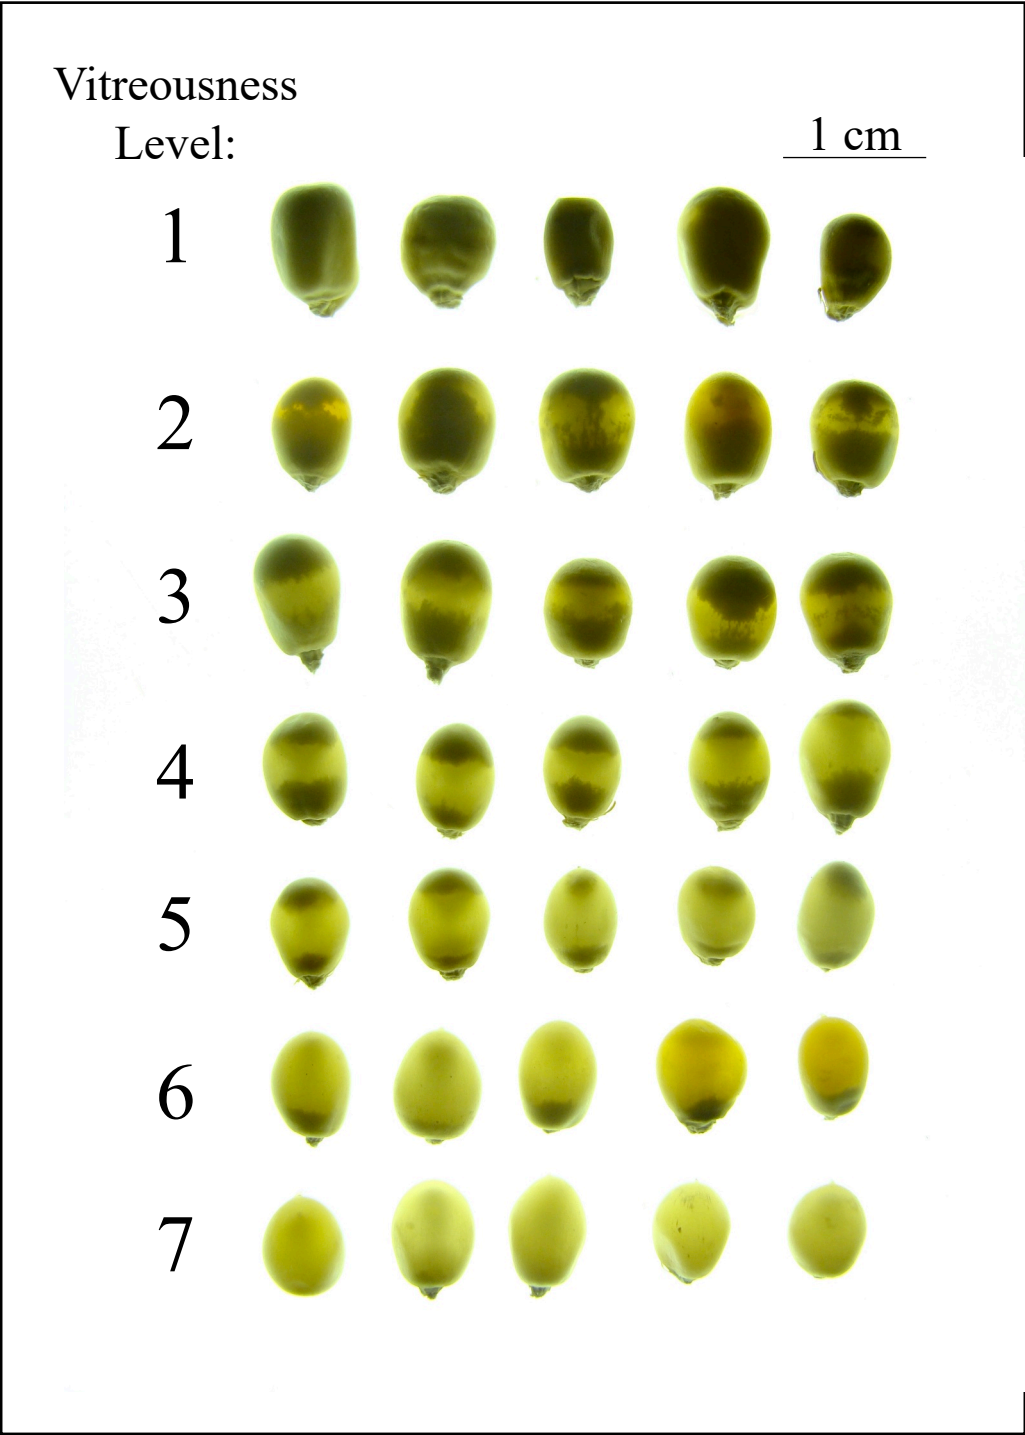

**Supplementary Figure 1 | Popcorn kernel endosperm vitreousness scale.**  
Ten grams of kernels were randomly selected from each row of the 2019 field and scored on a continuous scale of 1-7, with a rank of ‘1’ being nearly complete opacity and ‘7’ as completely vitreous.

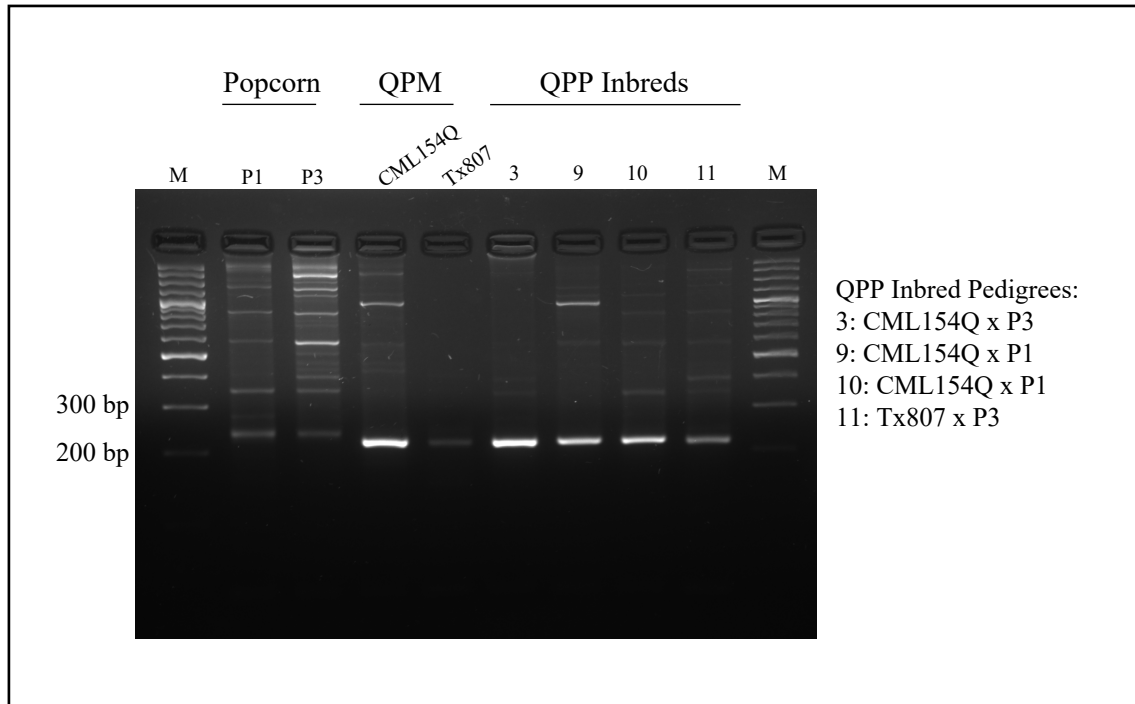

**Supplementary Figure 2 | DNA-based marker aided verification of *opaque-2* genotype in parental inbreds.** All QPP inbred parents were genotyped with *opaque-2* in-gene marker umc1066 and/or flanking marker bnlgl200. As shown, popcorn parents encode a differentiated, wild-type *opaque2* allele while QPM parents have a lower band. All QPP inbreds shown are crosses between Popcorn Parent 1, Popcorn Parent 3, and CML154Q and Tx807. All inbreds displayed the alike lower band to QPM parents.

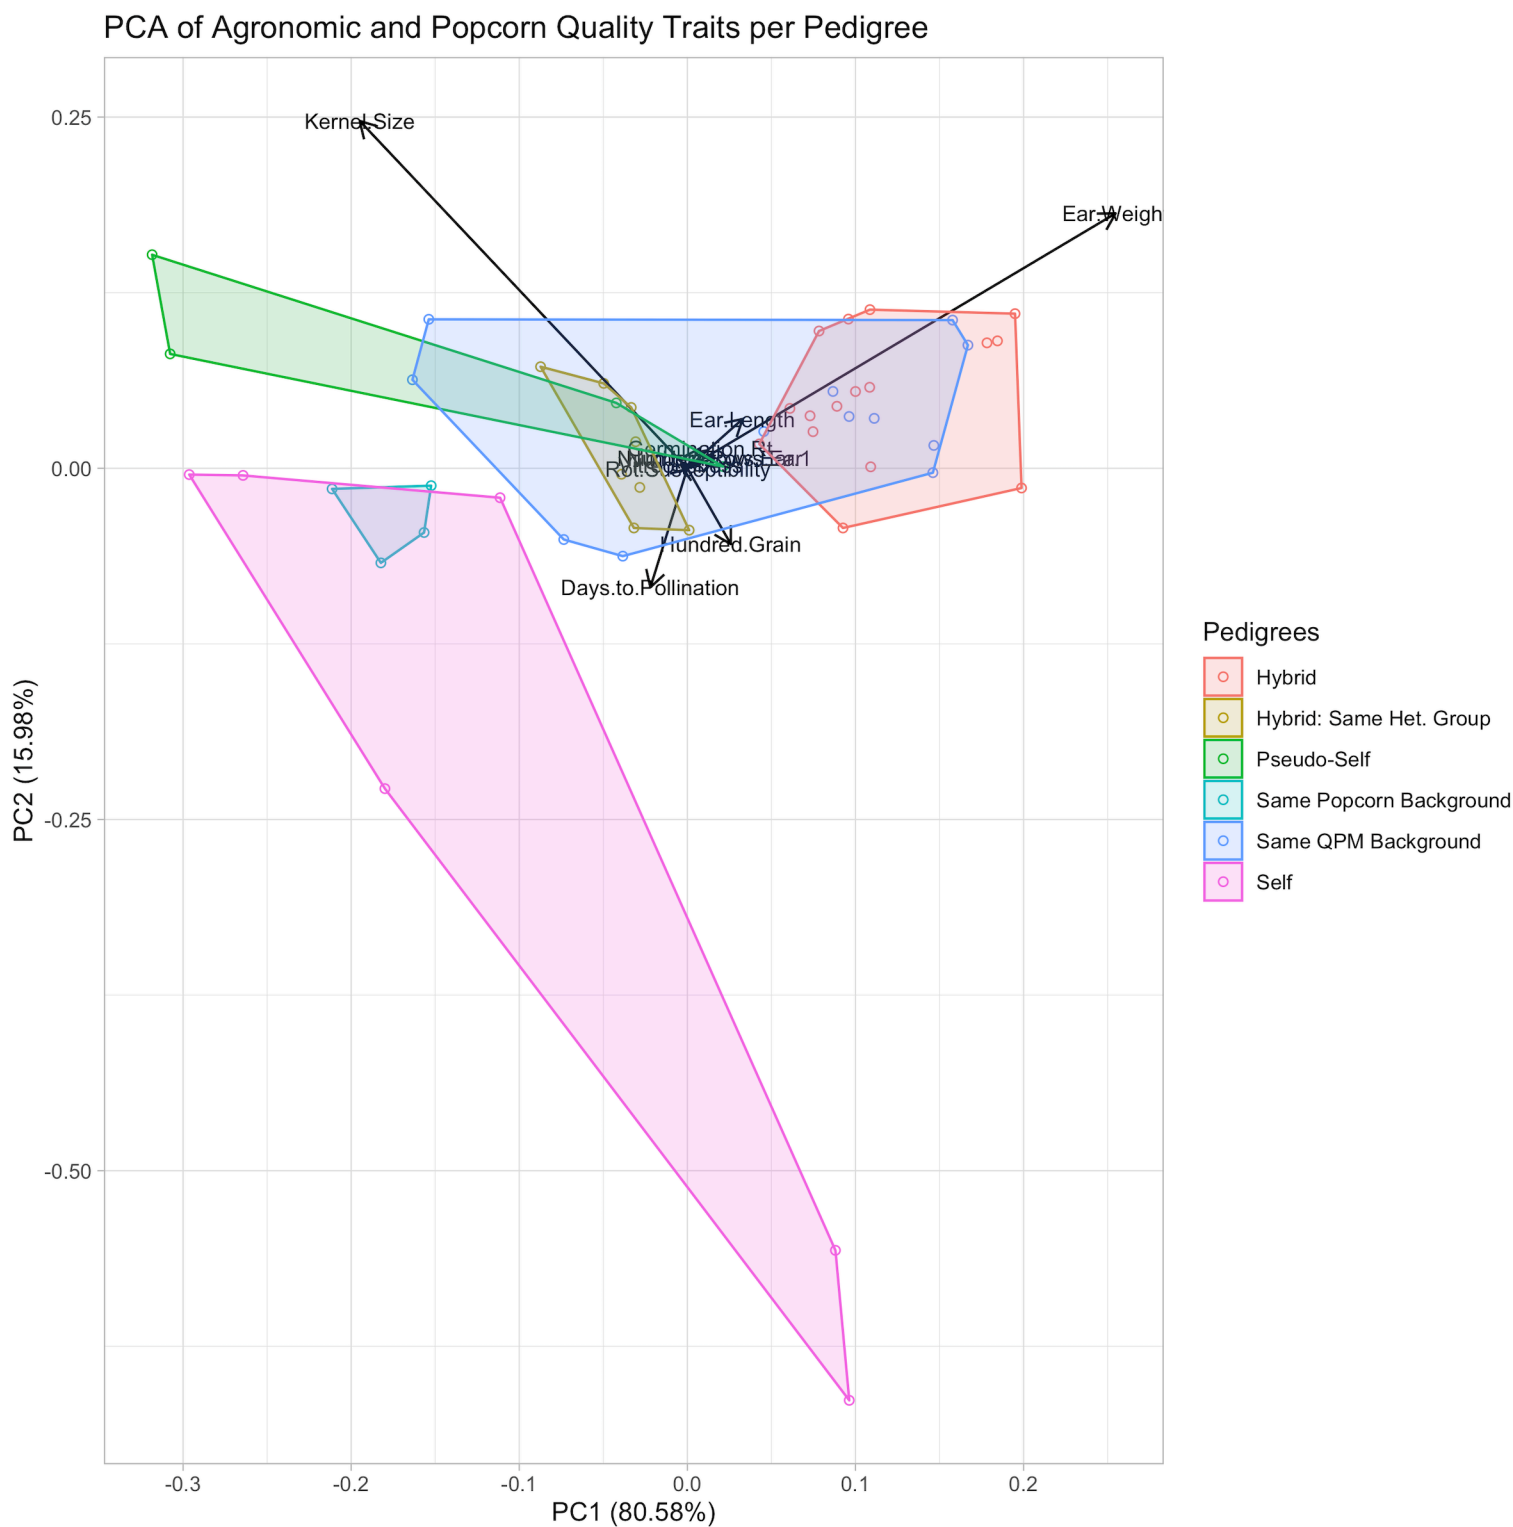

**Supplementary Figure 3 | Principle Component Analysis of QPP Hybrids, Inbreds, QPM, and Popcorn Parents Grown in 2019 fields.** Principle Component scores (PC1 and PC2) from each variable are described as text in plot. Six clusters of pedigree categories (Self, Pseudo-self, Same Popcorn Background, Same QPM Background, Hybrid: Same Het. Group, and Hybrid) were observed.

Principle Component Analysis of Free Amino Acid Profiles from Raw Kernel Flour in Multiple Germplasms

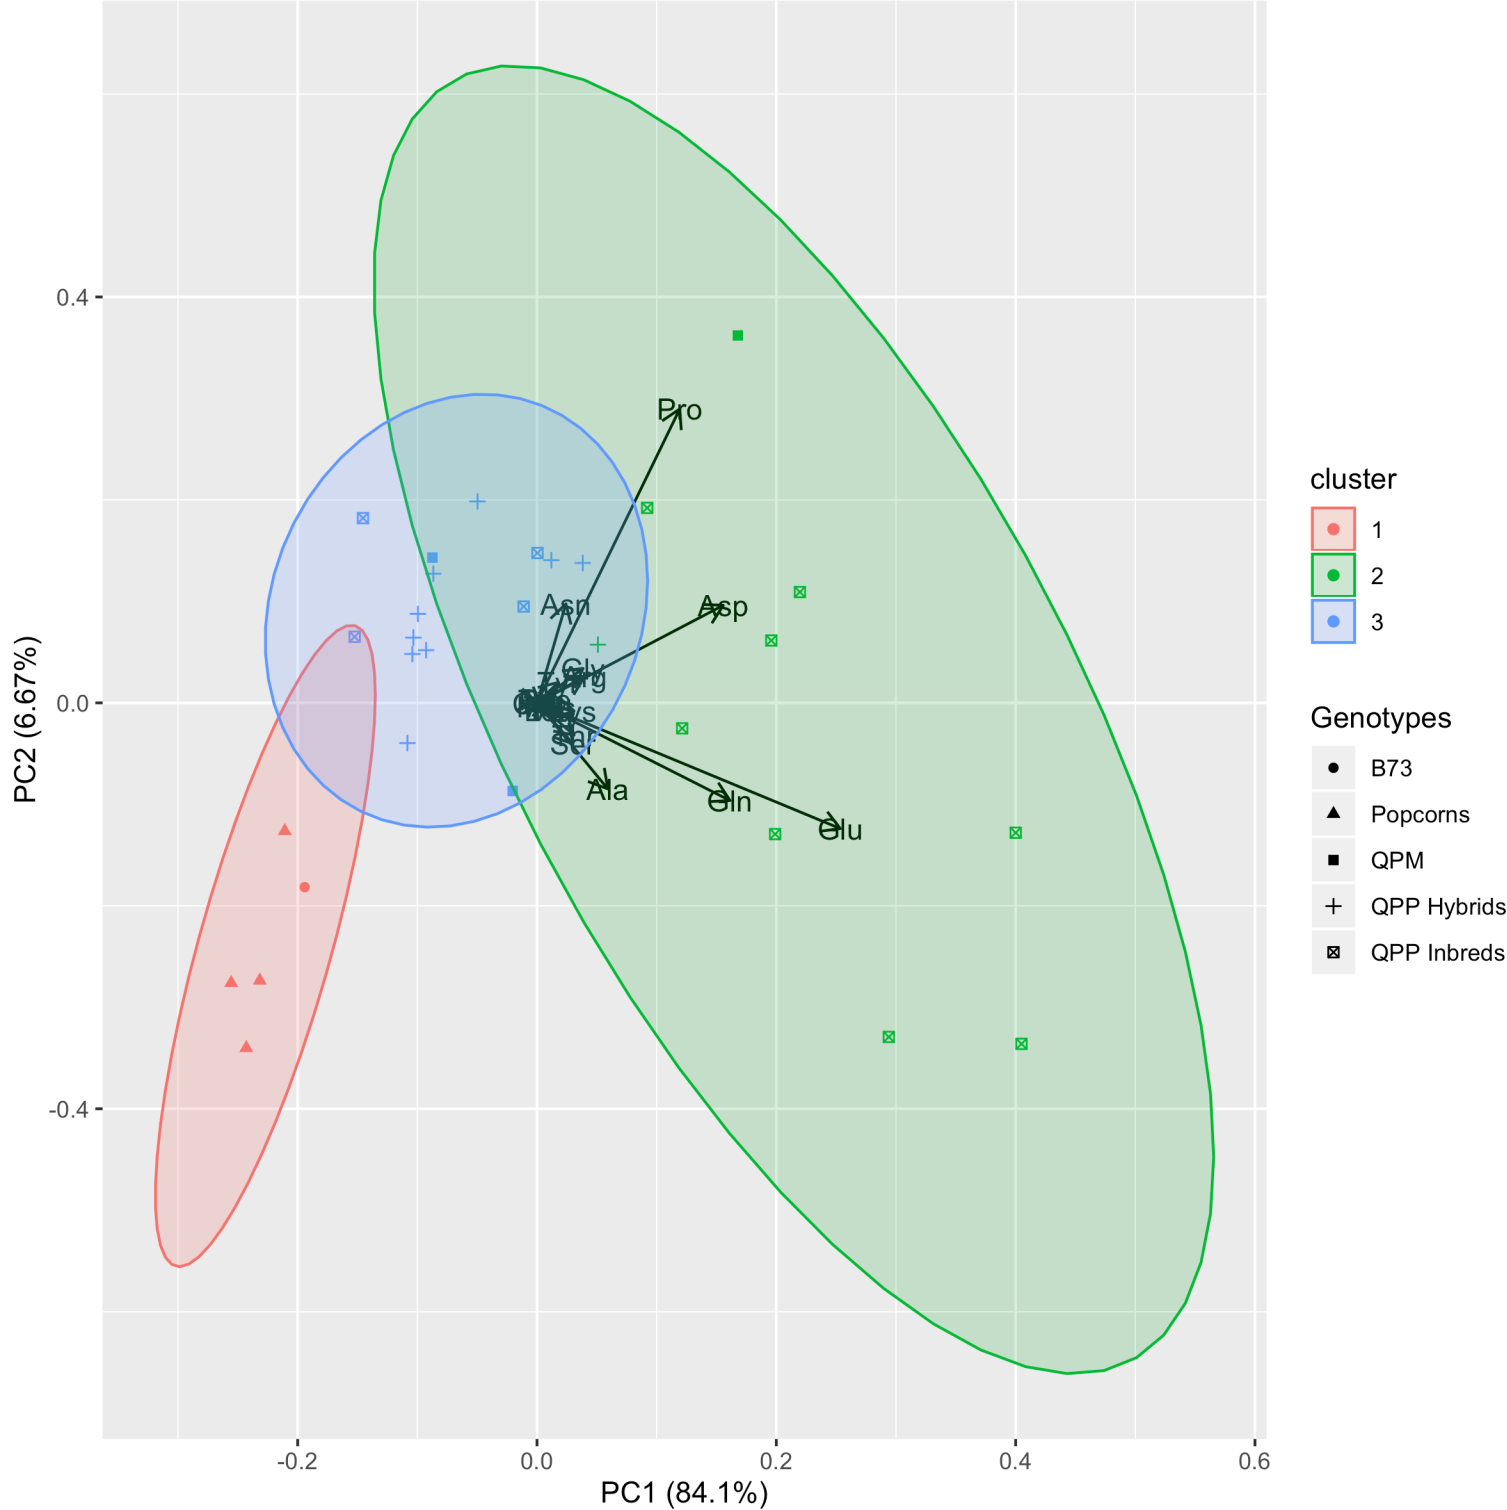

**Supplementary Figure 4 | Principle Component Analysis of Free Amino Acids from raw Kernel Flour in Multiple Germplasms.** All amino acids were available for quantification in free form. Three clusters arose from the data; one of popcorn parents (red), one of QPP hybrids (blue), and one of QPP inbreds (green). Inbreds were characterized with higher proline, aspartate, glutamate, and glutamine levels. QPP hybrids overlapped with both clusters though most overlay occurred between QPP Inbreds and Hybrids. QPM inbreds were present in both QPP inbred and hybrid clusters.

## A Comparison of free Tryptophan between kernel flour and popped flakes

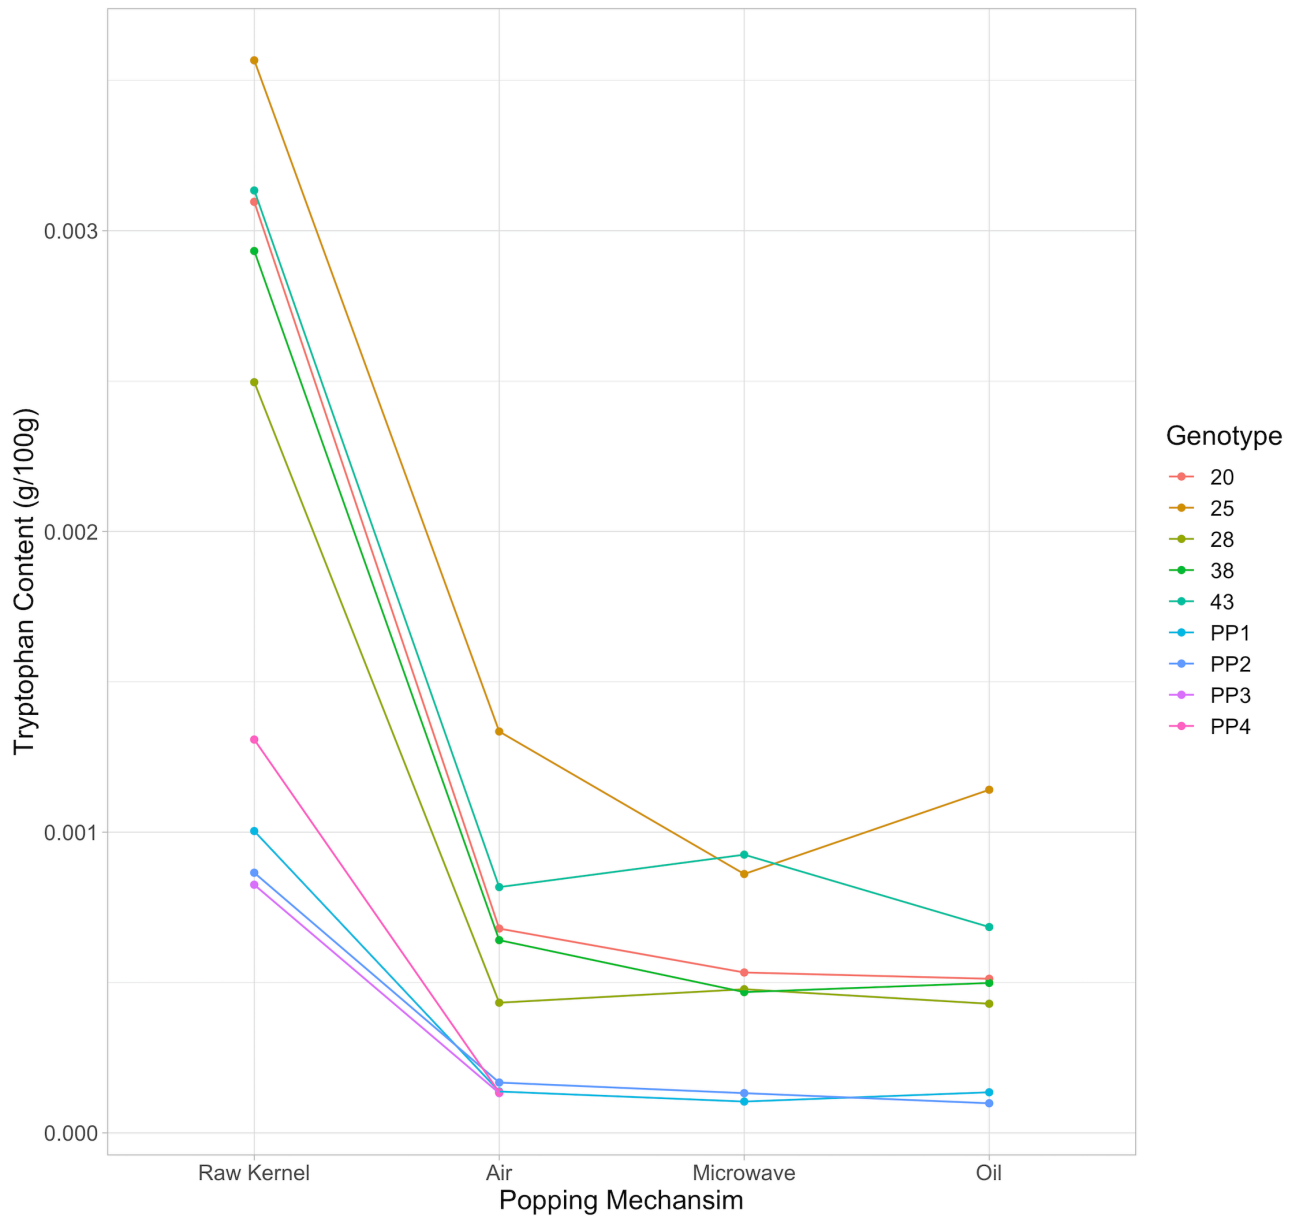

## B Free Tryptophan per Genotype

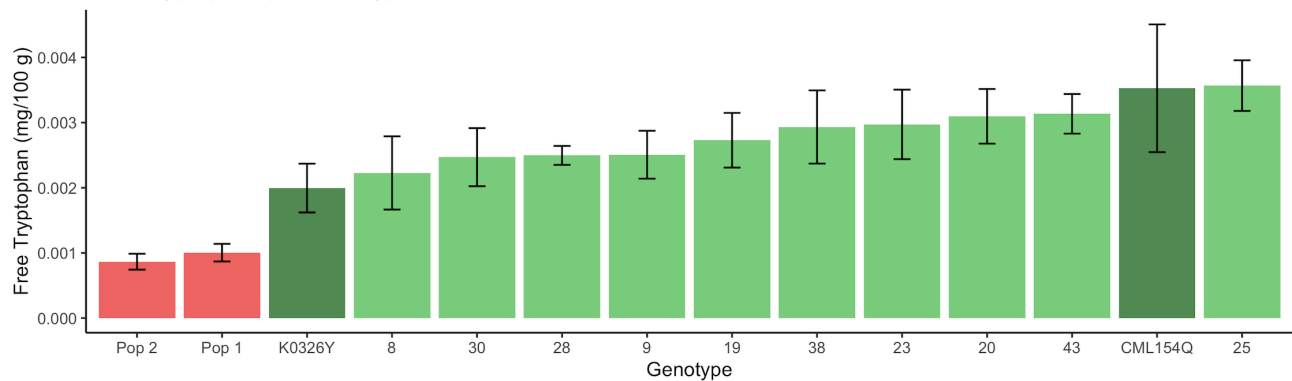

**Supplementary Figure 5 | Free Tryptophan Values and Effect of Popping Methods.** (A) Alike to protein-bound and free lysine, free tryptophan values from raw kernel flour decreased at a similar rate when popped by multiple methods and correlation coefficients were high (range of 0.882 – 0.992). (B) All QPP hybrids (light green) held larger raw kernel flour free-tryptophan values than popcorn parents (red) and potentially QPM parents (dark green). At minimum, QPP hybrids were insignificantly different in free tryptophan content than QPM parents.

| Genotype                | Ala         | Arg         | Asx         | Glx         | Gly         | His         | Ile         | Leu         | Lys         | Met         | Phe         | Pro         | Ser         | Thr         | Tyr         | Val         |
|-------------------------|-------------|-------------|-------------|-------------|-------------|-------------|-------------|-------------|-------------|-------------|-------------|-------------|-------------|-------------|-------------|-------------|
| <i>Popcorn Parent 1</i> | 1.101±0.052 | 0.358±0.023 | 0.793±0.056 | 2.751±0.075 | 0.952±0.08  | 0.452±0.014 | 0.647±0.044 | 2.084±0.123 | 0.372±0.026 | 0.257±0.021 | 0.71±0.014  | 1.267±0.058 | 0.692±0.03  | 0.589±0.049 | 0.461±0.034 | 0.557±0.02  |
| <i>Popcorn Parent 2</i> | 0.963±0.126 | 0.362±0.025 | 0.664±0.047 | 2.449±0.201 | 0.886±0.115 | 0.394±0.015 | 0.58±0.059  | 1.852±0.177 | 0.326±0.018 | 0.194±0.02  | 0.652±0.051 | 1.1±0.069   | 0.638±0.061 | 0.5±0.042   | 0.379±0.035 | 0.498±0.032 |
| <i>Popcorn Parent 3</i> | 0.996±0.012 | 0.354±0.002 | 0.685±0.006 | 2.446±0.048 | 0.804±0.009 | 0.385±0.015 | 0.563±0.004 | 1.848±0.042 | 0.415±0.015 | 0.196±0.004 | 0.667±0.027 | 1.216±0.003 | 0.658±0     | 0.591±0.034 | 0.413±0.037 | 0.5±0       |
| <i>Popcorn Parent 4</i> | 1.385±0.035 | 0.402±0.017 | 0.861±0.002 | 3.145±0.189 | 1.222±0.035 | 0.458±0.017 | 0.802±0.02  | 2.617±0.171 | 0.363±0.049 | 0.236±0.009 | 0.817±0.05  | 1.321±0.077 | 0.832±0.04  | 0.628±0.038 | 0.574±0.008 | 0.662±0.012 |
| <i>B73</i>              | 0.92±0.041  | 0.46±0.02   | 0.735±0.041 | 2.369±0.108 | 0.924±0.07  | 0.439±0.017 | 0.554±0.041 | 1.65±0.096  | 0.457±0.033 | 0.209±0.007 | 0.636±0.025 | 1.078±0.054 | 0.64±0.023  | 0.523±0.031 | 0.373±0.006 | 0.538±0.028 |
| <i>CML154Q</i>          | 0.754±0.058 | 0.57±0.033  | 1.098±0.133 | 2.233±0.161 | 0.93±0.029  | 0.541±0.026 | 0.509±0.051 | 1.187±0.173 | 0.629±0.022 | 0.153±0.007 | 0.557±0.037 | 1.183±0.102 | 0.586±0.04  | 0.548±0.04  | 0.311±0.034 | 0.6±0.007   |
| <i>K0326Y</i>           | 0.751±0.107 | 0.585±0.057 | 0.955±0.185 | 2.16±0.213  | 0.866±0.125 | 0.576±0.024 | 0.487±0.047 | 1.257±0.141 | 0.589±0.066 | 0.166±0.013 | 0.545±0.05  | 1.168±0.088 | 0.611±0.069 | 0.543±0.062 | 0.307±0.023 | 0.603±0.052 |
| <i>Tx807</i>            | 0.874±0.109 | 0.632±0.046 | 1.496±0.026 | 2.447±0.097 | 0.99±0.032  | 0.571±0.019 | 0.609±0.059 | 1.56±0.231  | 0.667±0.002 | 0.15±0.009  | 0.663±0.046 | 1.132±0.08  | 0.689±0.053 | 0.604±0.049 | 0.351±0.016 | 0.63±0.023  |
| <i>QPP Inbred 1</i>     | 0.674±0.05  | 0.401±0.045 | 0.967±0.026 | 2.247±0.043 | 0.876±0.104 | 0.527±0.031 | 0.448±0.034 | 1.166±0.115 | 0.503±0.018 | 0.122±0.011 | 0.503±0.033 | 1.12±0.032  | 0.518±0.024 | 0.483±0.009 | 0.302±0.034 | 0.53±0.042  |
| <i>QPP Inbred 2</i>     | 0.57±0.033  | 0.489±0.046 | 0.869±0.151 | 1.828±0.158 | 0.724±0.076 | 0.486±0.015 | 0.378±0.027 | 0.919±0.112 | 0.502±0.044 | 0.111±0.005 | 0.446±0.064 | 0.98±0.05   | 0.485±0.042 | 0.43±0.051  | 0.251±0.011 | 0.488±0.031 |
| <i>QPP Inbred 3</i>     | 0.722±0.071 | 0.449±0.038 | 0.985±0.208 | 2.258±0.011 | 0.797±0.052 | 0.504±0.037 | 0.457±0.062 | 1.052±0.16  | 0.557±0.06  | 0.133±0.005 | 0.49±0.073  | 1.014±0.003 | 0.53±0.065  | 0.531±0.047 | 0.274±0.012 | 0.538±0.051 |
| <i>QPP Inbred 4</i>     | 0.67±0.066  | 0.454±0.001 | 0.908±0.053 | 2.33±0.044  | 0.935±0.036 | 0.486±0.017 | 0.424±0.031 | 0.969±0.172 | 0.591±0.04  | 0.14±0.006  | 0.463±0.013 | 1.059±0.085 | 0.521±0.033 | 0.523±0.005 | 0.293±0     | 0.527±0.014 |
| <i>QPP Inbred 5</i>     | 0.599±0.045 | 0.427±0.011 | 0.8±0.014   | 2.07±0.083  | 0.803±0.027 | 0.523±0.014 | 0.414±0.05  | 1.073±0.135 | 0.491±0.008 | 0.11±0.004  | 0.476±0.063 | 1.131±0.049 | 0.504±0.042 | 0.467±0.028 | 0.273±0.052 | 0.52±0.015  |
| <i>QPP Inbred 6</i>     | 0.684±0.089 | 0.448±0.036 | 0.801±0.011 | 2.016±0.02  | 0.803±0.071 | 0.546±0.012 | 0.47±0.034  | 1.128±0.055 | 0.563±0.047 | 0.104±0.005 | 0.514±0.062 | 1.167±0.017 | 0.539±0.033 | 0.497±0.046 | 0.309±0.023 | 0.564±0.041 |
| <i>QPP Inbred 7</i>     | 1.045±0.031 | 0.546±0.024 | 1.512±0.033 | 2.847±0.074 | 1.13±0.105  | 0.539±0.016 | 0.62±0.013  | 1.674±0.024 | 0.61±0.007  | 0.127±0     | 0.698±0     | 1.211±0.029 | 0.696±0.033 | 0.622±0.005 | 0.386±0.039 | 0.641±0.002 |
| <i>QPP Inbred 8</i>     | 0.951±0.087 | 0.638±0.017 | 1.27±0.021  | 2.603±0.158 | 1.033±0.091 | 0.606±0.023 | 0.656±0.068 | 1.726±0.251 | 0.65±0.02   | 0.154±0.002 | 0.692±0.102 | 1.367±0.075 | 0.73±0.114  | 0.646±0.058 | 0.392±0.074 | 0.717±0.036 |
| <i>QPP Inbred 9</i>     | 0.617±0.065 | 0.424±0.055 | 0.64±0.007  | 1.766±0.132 | 0.782±0.009 | 0.512±0.037 | 0.414±0.026 | 1.034±0.103 | 0.485±0.018 | 0.106±0.014 | 0.451±0.034 | 1.027±0.093 | 0.485±0.046 | 0.461±0.027 | 0.274±0.015 | 0.525±0.038 |
| <i>QPP Inbred 10</i>    | 0.643±0.023 | 0.454±0.066 | 0.785±0.039 | 1.906±0.115 | 0.867±0.018 | 0.525±0.026 | 0.48±0.022  | 1.155±0.05  | 0.551±0.016 | 0.132±0.006 | 0.534±0.04  | 1.045±0.035 | 0.523±0.022 | 0.471±0.034 | 0.327±0.022 | 0.561±0.038 |
| <i>QPP Inbred 11</i>    | 0.636±0.016 | 0.496±0.064 | 0.888±0.149 | 2.049±0.041 | 0.736±0.071 | 0.49±0.004  | 0.436±0.001 | 1.046±0.028 | 0.644±0.04  | 0.131±0.005 | 0.484±0.022 | 1.112±0.02  | 0.527±0.017 | 0.584±0.011 | 0.296±0.018 | 0.541±0.012 |
| <i>QPP Inbred 12</i>    | 0.843±0.021 | 0.488±0.032 | 0.88±0.056  | 2.311±0.06  | 0.87±0.035  | 0.535±0.006 | 0.49±0.001  | 1.258±0.026 | 0.635±0.015 | 0.141±0     | 0.548±0.023 | 1.192±0.018 | 0.603±0.009 | 0.596±0.001 | 0.353±0.012 | 0.605±0.001 |
| <i>QPP Hybrid 8</i>     | 0.634±0.048 | 0.457±0.029 | 0.805±0.101 | 1.911±0.049 | 0.826±0.121 | 0.562±0.049 | 0.417±0.026 | 1.114±0.063 | 0.477±0.017 | 0.125±0.015 | 0.495±0.028 | 1.055±0.065 | 0.505±0.031 | 0.472±0.023 | 0.316±0.033 | 0.521±0.024 |
| <i>QPP Hybrid 9</i>     | 0.667±0.039 | 0.444±0.057 | 0.865±0.087 | 1.972±0.083 | 0.856±0.103 | 0.535±0.028 | 0.451±0.027 | 1.202±0.063 | 0.469±0.045 | 0.128±0.019 | 0.525±0.026 | 1.051±0.039 | 0.52±0.033  | 0.483±0.027 | 0.309±0.026 | 0.529±0.029 |
| <i>QPP Hybrid 19</i>    | 0.708±0.12  | 0.498±0.088 | 0.868±0.204 | 2.005±0.23  | 0.828±0.117 | 0.577±0.047 | 0.474±0.074 | 1.192±0.185 | 0.525±0.077 | 0.126±0.013 | 0.536±0.071 | 1.097±0.063 | 0.548±0.07  | 0.496±0.069 | 0.322±0.022 | 0.563±0.06  |
| <i>QPP Hybrid 20</i>    | 0.73±0.065  | 0.513±0.058 | 0.981±0.137 | 2.128±0.117 | 0.946±0.045 | 0.582±0.037 | 0.512±0.036 | 1.327±0.082 | 0.558±0.047 | 0.138±0.017 | 0.571±0.026 | 1.136±0.057 | 0.591±0.031 | 0.54±0.033  | 0.331±0.012 | 0.583±0.04  |
| <i>QPP Hybrid 23</i>    | 0.67±0.049  | 0.469±0.021 | 1.001±0.199 | 2.073±0.163 | 0.85±0.054  | 0.534±0.014 | 0.457±0.028 | 1.165±0.083 | 0.504±0.014 | 0.124±0.006 | 0.519±0.036 | 1.082±0.022 | 0.532±0.023 | 0.476±0.018 | 0.299±0.018 | 0.532±0.013 |
| <i>QPP Hybrid 25</i>    | 0.624±0.014 | 0.517±0.04  | 0.895±0.135 | 1.998±0.074 | 0.839±0.084 | 0.548±0.03  | 0.421±0.011 | 1.03±0.032  | 0.536±0.042 | 0.132±0.012 | 0.474±0.012 | 1.059±0.05  | 0.513±0.035 | 0.482±0.024 | 0.293±0.016 | 0.542±0.024 |
| <i>QPP Hybrid 28</i>    | 0.666±0.072 | 0.493±0.072 | 0.839±0.169 | 2.041±0.242 | 0.813±0.143 | 0.57±0.035  | 0.474±0.053 | 1.223±0.154 | 0.524±0.047 | 0.119±0.021 | 0.529±0.071 | 1.126±0.088 | 0.559±0.064 | 0.51±0.051  | 0.286±0.045 | 0.565±0.052 |
| <i>QPP Hybrid 30</i>    | 0.705±0.065 | 0.509±0.041 | 0.813±0.094 | 2.048±0.098 | 0.817±0.01  | 0.542±0.035 | 0.472±0.025 | 1.214±0.106 | 0.539±0.039 | 0.143±0.022 | 0.534±0.029 | 1.121±0.076 | 0.557±0.04  | 0.528±0.034 | 0.307±0.024 | 0.562±0.029 |
| <i>QPP Hybrid 38</i>    | 0.71±0.053  | 0.528±0.035 | 0.964±0.171 | 2.061±0.148 | 0.9±0.116   | 0.555±0.029 | 0.478±0.04  | 1.217±0.106 | 0.552±0.024 | 0.137±0.014 | 0.54±0.037  | 1.107±0.061 | 0.558±0.048 | 0.527±0.03  | 0.29±0.032  | 0.571±0.038 |
| <i>QPP Hybrid 43</i>    | 0.702±0.067 | 0.51±0.046  | 0.97±0.186  | 2.073±0.131 | 0.819±0.087 | 0.52±0.017  | 0.474±0.022 | 1.175±0.072 | 0.589±0.03  | 0.149±0.019 | 0.533±0.033 | 1.109±0.044 | 0.546±0.023 | 0.55±0.04   | 0.301±0.022 | 0.55±0.013  |

**Supplementary Table 1: Protein-Bound Amino Acid Values (g/100g) in Raw Kernel Flour.** Protein-bound amino acid values of sixteen amino acids are recorded. Aspartate and asparagine (Asx), glutamine and glutamate (Glx), Serine, and Tryptophan are destroyed during acidic hydrolysis, the procedure used for amino acid quantification. Standard deviations were calculated by two-six biological replications, dependent on genotype. Lysine levels are shaded in gray.

|                  | Ala           | Arg           | Asn           | Asp           | Gln           | Glu           | Gly           | His           | Ile           | Leu           |
|------------------|---------------|---------------|---------------|---------------|---------------|---------------|---------------|---------------|---------------|---------------|
| Popcorn Parent 4 | 0.0054±0.0008 | 0.0059±0.0004 | 0.0235±0.0027 | 0.004±0.0002  | 0.0001±0      | 0.0047±0.0002 | 0.0015±0.0003 | 0.0024±0.0003 | 0.0004±0.0001 | 0.0005±0      |
| Popcorn Parent 3 | 0.0187±0.0011 | 0.0063±0.0003 | 0.0211±0      | 0.0101±0.0023 | 0.0031±0      | 0.0132±0.0037 | 0.0064±0.0003 | 0.0045±0      | 0.0007±0      | 0.001±0.0002  |
| Popcorn Parent 1 | 0.0046±0.0016 | 0.0052±0.0001 | 0.0407±0.0034 | 0.0084±0.0023 | 0.0081±0.0061 | 0.0146±0.0034 | 0.0057±0.001  | 0.0045±0.0012 | 0.0005±0      | 0.0005±0      |
| Popcorn Parent 2 | 0.0023±0.0004 | 0.0074±0.0015 | 0.0268±0.0024 | 0.0046±0.0013 | 0.0023±0.0005 | 0.0173±0.0025 | 0.0059±0.0013 | 0.0022±0.0005 | 0.0001±0      | 0.0002±0      |
| B73              | 0.0072±0.0023 | 0.0072±0.0012 | 0.0295±0.0021 | 0.0155±0.0056 | 0.0035±0.001  | 0.0316±0.0031 | 0.0089±0.002  | 0.0029±0.001  | 0.0006±0.0001 | 0.0007±0.0001 |
| CML154Q          | 0.0205±0.0068 | 0.0396±0.0019 | 0.0713±0.0078 | 0.1241±0.0088 | 0.0958±0.0366 | 0.1199±0.0146 | 0.0308±0.0011 | 0.0132±0.0026 | 0.0033±0.0013 | 0.0065±0.0032 |
| K0326Y           | 0.0101±0.005  | 0.0295±0.0093 | 0.0704±0.0137 | 0.0711±0.0325 | 0.015±0.0153  | 0.0433±0.0237 | 0.0235±0.0073 | 0.0119±0.0045 | 0.0029±0.0026 | 0.0031±0.0027 |
| QPP Inbred 1     | 0.0274±0.0198 | 0.0283±0.0004 | 0.0676±0.0059 | 0.1289±0.0022 | 0.099±0.0761  | 0.1588±0.053  | 0.0335±0.0005 | 0.0087±0.0019 | 0.0027±0.0024 | 0.0061±0.0046 |
| QPP Inbred 10    | 0.0046±0.0003 | 0.0113±0.0014 | 0.0486±0.0012 | 0.029±0.0022  | 0.0047±0.0006 | 0.031±0.0016  | 0.0103±0.0004 | 0.0055±0.0019 | 0.001±0       | 0.0008±0      |
| QPP Inbred 11    | 0.0339±0.0201 | 0.0417±0.0046 | 0.0443±0.0113 | 0.1151±0.0011 | 0.0787±0.0373 | 0.1855±0.0048 | 0.0434±0.0014 | 0.0101±0.002  | 0.002±0.0006  | 0.0055±0.0036 |
| QPP Inbred 12    | 0.0931±0.0423 | 0.0346±0.0035 | 0.0422±0.0065 | 0.116±0.0058  | 0.0677±0.0228 | 0.1715±0.0277 | 0.0483±0.0062 | 0.0108±0.0004 | 0.0045±0      | 0.0133±0.0019 |
| QPP Inbred 2     | 0.0152±0.0023 | 0.0292±0.0011 | 0.0682±0.0118 | 0.1067±0.0203 | 0.0511±0.0093 | 0.1248±0.0098 | 0.0335±0.0009 | 0.0078±0.0019 | 0.0008±0.0003 | 0.0023±0.0004 |
| QPP Inbred 3     | 0.05±0.024    | 0.036±0.0009  | 0.0598±0.012  | 0.1332±0.0213 | 0.1658±0.0847 | 0.2007±0.0464 | 0.034±0.0019  | 0.0195±0.0006 | 0.0014±0.0005 | 0.006±0.0047  |
| QPP Inbred 4     | 0.0532±0.0036 | 0.0409±0.0002 | 0.0548±0.008  | 0.1637±0.0131 | 0.1724±0.0445 | 0.2373±0.0174 | 0.0343±0.0002 | 0.019±0.0076  | 0.0029±0.0006 | 0.0102±0.0004 |
| QPP Inbred 5     | 0.0176±0.0103 | 0.0336±0.0028 | 0.0598±0.0035 | 0.1047±0.0027 | 0.0819±0.0834 | 0.1398±0.0637 | 0.0315±0.0016 | 0.0114±0.0022 | 0.0013±0.0004 | 0.0034±0.0019 |
| QPP Inbred 6     | 0.0114±0.0032 | 0.0354±0.0032 | 0.0442±0.0032 | 0.0766±0.0129 | 0.0227±0.0256 | 0.0949±0.0627 | 0.0352±0.0169 | 0.0093±0.002  | 0.002±0.0006  | 0.0021±0.0011 |
| QPP Inbred 7     | 0.0637±0.0134 | 0.0551±0.0017 | 0.0667±0.0004 | 0.1561±0.0068 | 0.1082±0.0229 | 0.292±0.0241  | 0.0486±0.0003 | 0.0201±0.0004 | 0.0041±0.0003 | 0.0093±0.0011 |
| QPP Inbred 8     | 0.0146±0.0035 | 0.0528±0.0065 | 0.0648±0.0049 | 0.0931±0.0379 | 0.0084±0.0092 | 0.0907±0.0473 | 0.0393±0.0082 | 0.0149±0.0027 | 0.001±0.0002  | 0.0012±0.0005 |
| QPP Inbred 9     | 0.0041±0.0001 | 0.0182±0.0011 | 0.0369±0.0071 | 0.0214±0.0091 | 0.0051±0.0004 | 0.0362±0.0023 | 0.0151±0.0102 | 0.0048±0.0007 | 0.0015±0      | 0.0011±0      |
| Tx807            | 0.0134±0.0011 | 0.0344±0.0004 | 0.0954±0.0035 | 0.1004±0.0065 | 0.0217±0.0085 | 0.0898±0.0075 | 0.0321±0.0007 | 0.0145±0.0014 | 0.0015±0.0002 | 0.0033±0.0004 |
| Hybrid 19        | 0.0066±0.0011 | 0.0247±0.0058 | 0.0636±0.0114 | 0.0676±0.0189 | 0.0064±0.0054 | 0.0508±0.0228 | 0.0232±0.0062 | 0.0075±0.0022 | 0.0005±0.0001 | 0.0009±0.0004 |
| Hybrid 20        | 0.0089±0.002  | 0.0235±0.0046 | 0.0704±0.0096 | 0.0721±0.0102 | 0.0075±0.0073 | 0.0535±0.0234 | 0.0251±0.0057 | 0.0077±0.0013 | 0.0006±0.0001 | 0.0008±0.0001 |
| Hybrid 23        | 0.014±0.0036  | 0.0186±0.0054 | 0.0698±0.0079 | 0.1053±0.0158 | 0.0517±0.0423 | 0.0932±0.0262 | 0.0306±0.0011 | 0.0083±0.0032 | 0.001±0.0004  | 0.0028±0.0015 |
| Hybrid 25        | 0.0167±0.009  | 0.0243±0.002  | 0.0629±0.0089 | 0.1068±0.0349 | 0.0702±0.0704 | 0.0932±0.0484 | 0.0279±0.0061 | 0.009±0.0023  | 0.0013±0.001  | 0.0036±0.0032 |
| Hybrid 28        | 0.007±0.0014  | 0.0201±0.0059 | 0.0614±0.0081 | 0.0692±0.0253 | 0.0137±0.0173 | 0.0532±0.0281 | 0.0226±0.0071 | 0.0071±0.0015 | 0.0005±0      | 0.0009±0.0005 |
| Hybrid 30        | 0.012±0.0044  | 0.0131±0.006  | 0.0576±0.0142 | 0.0688±0.0322 | 0.0214±0.0262 | 0.0648±0.036  | 0.0227±0.0098 | 0.0073±0.0022 | 0.0006±0.0001 | 0.0013±0.0008 |
| Hybrid 38        | 0.0071±0.0023 | 0.0213±0.0081 | 0.0703±0.0122 | 0.0624±0.0226 | 0.0079±0.0089 | 0.0513±0.0222 | 0.0241±0.0074 | 0.0075±0.0024 | 0.0005±0.0001 | 0.0009±0.0002 |
| Hybrid 43        | 0.0121±0.0033 | 0.0265±0.0063 | 0.0693±0.0124 | 0.0809±0.0207 | 0.0399±0.0433 | 0.0928±0.0404 | 0.0292±0.0049 | 0.0087±0.0021 | 0.0009±0.0001 | 0.0015±0.0005 |
| Hybrid 8         | 0.0063±0.0012 | 0.0216±0.0043 | 0.0605±0.0081 | 0.0677±0.0215 | 0.0112±0.0101 | 0.0484±0.0261 | 0.0218±0.0081 | 0.0062±0.0016 | 0.0003±0      | 0.0008±0.0002 |
| Hybrid 9         | 0.0068±0.0029 | 0.0171±0.0069 | 0.0635±0.0061 | 0.0646±0.0149 | 0.014±0.0198  | 0.0519±0.0223 | 0.0242±0.0045 | 0.0059±0.0019 | 0.0004±0.0001 | 0.0008±0.0004 |

**Supplementary Table 2: Free Amino Acid Values (g/100g) in Raw Kernel Flour.** Free amino acid values of all twenty amino acids are recorded. Standard deviations were calculated by two-six biological replications, dependent on genotype.

|                  | Lys           | Met           | Phe           | Pro           | Ser           | Trp           | Thr           | Tyr           | Val           | Cys           |
|------------------|---------------|---------------|---------------|---------------|---------------|---------------|---------------|---------------|---------------|---------------|
| Popcorn Parent 4 | 0.0031±0.0005 | 0.0001±0      | 0.0006±0      | 0.0138±0.0009 | 0.0011±0.0001 | 0.0013±0      | 0.0008±0.0001 | 0.0024±0.0001 | 0.0011±0.0001 | 0.0001±0      |
| Popcorn Parent 3 | 0.0038±0.0005 | 0.0002±0      | 0.002±0.0003  | 0.052±0.0046  | 0.0077±0.0004 | 0.0008±0      | 0.002±0       | 0.0032±0.0002 | 0.0015±0      | 0.0001±0      |
| Popcorn Parent 1 | 0.0029±0.0001 | 0.0002±0.0001 | 0.0008±0.0001 | 0.0135±0.0073 | 0.0022±0.0008 | 0.001±0.0001  | 0.0009±0.0002 | 0.0021±0.0002 | 0.0011±0.0001 | 0.0001±0      |
| Popcorn Parent 2 | 0.0028±0.0005 | 0.0001±0      | 0.0005±0.0001 | 0.0043±0.0031 | 0.0027±0.0012 | 0.0008±0.0001 | 0.0008±0.0002 | 0.0017±0.0002 | 0.0007±0      | 0.0001±0      |
| B73              | 0.0029±0.0005 | 0.0004±0.0001 | 0.0011±0.0001 | 0.0393±0.0102 | 0.0021±0.0006 | 0.001±0.0002  | 0.0007±0.0002 | 0.0049±0.0024 | 0.0015±0.0001 | 0.0001±0      |
| CML154Q          | 0.0266±0.0058 | 0.0029±0.0015 | 0.0094±0.0033 | 0.1691±0.0681 | 0.0151±0.009  | 0.0035±0.0009 | 0.0113±0.0051 | 0.0304±0.0082 | 0.0094±0.0032 | 0.0005±0      |
| K0326Y           | 0.0214±0.01   | 0.0007±0.0007 | 0.0027±0.0019 | 0.0814±0.0286 | 0.0111±0.0081 | 0.0019±0.0003 | 0.0047±0.0031 | 0.0096±0.003  | 0.0045±0.0032 | 0.0002±0      |
| QPP Inbred 1     | 0.0162±0.0071 | 0.0035±0.0032 | 0.0053±0.0034 | 0.1297±0.0423 | 0.0155±0.0108 | 0.0033±0.0024 | 0.0191±0.0156 | 0.0128±0.0063 | 0.0076±0.0041 | 0.0005±0.0003 |
| QPP Inbred 10    | 0.006±0.0003  | 0.0001±0      | 0.0008±0      | 0.1015±0.0115 | 0.0009±0.0001 | 0.0025±0.0001 | 0.0018±0.0004 | 0.0047±0.0006 | 0.0017±0.0001 | 0.0001±0      |
| QPP Inbred 11    | 0.0177±0.0028 | 0.0007±0.0005 | 0.0048±0.0006 | 0.1554±0.0323 | 0.0126±0.0046 | 0.0027±0.0011 | 0.0166±0.0017 | 0.0121±0.0017 | 0.0053±0.0022 | 0.0008±0.0001 |
| QPP Inbred 12    | 0.0315±0.0079 | 0.0036±0.0007 | 0.0048±0      | 0.1205±0.0086 | 0.0335±0.006  | 0.002±0.0001  | 0.0317±0.0042 | 0.0092±0.0005 | 0.0116±0.0023 | 0.0011±0.0002 |
| QPP Inbred 2     | 0.0123±0.0003 | 0.001±0.0008  | 0.0029±0.0009 | 0.1267±0.0177 | 0.0071±0.0023 | 0.0026±0.0006 | 0.0065±0.0002 | 0.0098±0.0029 | 0.0034±0.0005 | 0.0003±0      |
| QPP Inbred 3     | 0.0226±0.0027 | 0.0016±0.0005 | 0.0055±0.0021 | 0.0986±0.0713 | 0.0238±0.0147 | 0.0043±0.0005 | 0.021±0.003   | 0.0174±0.0041 | 0.007±0.0027  | 0.0005±0.0001 |
| QPP Inbred 4     | 0.0302±0.0037 | 0.0021±0.0006 | 0.0068±0.0001 | 0.1509±0.0013 | 0.0255±0.0052 | 0.0034±0.0005 | 0.0286±0.0059 | 0.0182±0.0017 | 0.0111±0.0015 | 0.0009±0.0001 |
| QPP Inbred 5     | 0.0155±0.0064 | 0.0018±0.0012 | 0.0039±0.0016 | 0.1041±0.0349 | 0.0105±0.0043 | 0.0023±0.0003 | 0.0085±0.0032 | 0.0085±0.0024 | 0.0052±0.0022 | 0.0003±0.0001 |
| QPP Inbred 6     | 0.0141±0.0055 | 0.0007±0.0003 | 0.0024±0.001  | 0.1116±0.0352 | 0.0058±0.0003 | 0.0027±0.0004 | 0.0049±0.0021 | 0.007±0.0015  | 0.0043±0.0022 | 0.0004±0.0002 |
| QPP Inbred 7     | 0.0486±0.0072 | 0.0055±0.0007 | 0.0066±0.0011 | 0.112±0.0118  | 0.0384±0.0033 | 0.0044±0.0004 | 0.0344±0.0006 | 0.0217±0.0002 | 0.0156±0.0001 | 0.0004±0.0002 |
| QPP Inbred 8     | 0.0257±0.0079 | 0.0008±0.0008 | 0.0022±0.0016 | 0.0809±0.0173 | 0.0052±0.0031 | 0.0032±0.0006 | 0.0059±0.0046 | 0.0101±0.004  | 0.0026±0.0017 | 0.0004±0.0003 |
| QPP Inbred 9     | 0.0089±0.0019 | 0.0001±0      | 0.0011±0.0004 | 0.0853±0.0183 | 0.0014±0.0008 | 0.0017±0.0001 | 0.0021±0.0002 | 0.005±0.0004  | 0.0023±0      | 0.0001±0      |
| Tx807            | 0.0254±0.0013 | 0.0006±0.0001 | 0.0054±0.0001 | 0.0385±0.006  | 0.0107±0.0011 | 0.0028±0.0002 | 0.0112±0.0015 | 0.0134±0.0014 | 0.005±0.0005  | 0.0004±0      |
| Hybrid 19        | 0.0116±0.0025 | 0.0002±0      | 0.0019±0.0008 | 0.0717±0.0161 | 0.0028±0.0016 | 0.0027±0.0004 | 0.0035±0.0022 | 0.0065±0.0015 | 0.0019±0.0005 | 0.0001±0      |
| Hybrid 20        | 0.0126±0.0016 | 0.0002±0      | 0.0021±0.0006 | 0.078±0.023   | 0.0028±0.0015 | 0.003±0.0004  | 0.0037±0.0015 | 0.0087±0.0024 | 0.0022±0.0003 | 0.0001±0      |
| Hybrid 23        | 0.0115±0.004  | 0.0006±0.0004 | 0.0047±0.0023 | 0.1035±0.0246 | 0.0078±0.005  | 0.0029±0.0005 | 0.0096±0.0056 | 0.0122±0.0035 | 0.0041±0.0015 | 0.0003±0.0001 |
| Hybrid 25        | 0.015±0.005   | 0.0007±0.0007 | 0.0049±0.0032 | 0.0957±0.0256 | 0.0096±0.0095 | 0.0035±0.0003 | 0.0094±0.0081 | 0.0166±0.0087 | 0.0051±0.0034 | 0.0003±0.0001 |
| Hybrid 28        | 0.0123±0.0024 | 0.0002±0      | 0.0017±0.0011 | 0.0686±0.0188 | 0.0027±0.0016 | 0.0024±0.0001 | 0.0033±0.0023 | 0.0076±0.0029 | 0.0021±0.0006 | 0.0001±0      |
| Hybrid 30        | 0.0085±0.0025 | 0.0002±0.0001 | 0.0023±0.0013 | 0.1095±0.0128 | 0.0038±0.0032 | 0.0024±0.0004 | 0.005±0.0039  | 0.0121±0.0049 | 0.0026±0.0014 | 0.0002±0      |
| Hybrid 38        | 0.0137±0.0033 | 0.0001±0      | 0.0017±0.0011 | 0.0673±0.0102 | 0.0025±0.0015 | 0.0029±0.0005 | 0.0032±0.0015 | 0.0089±0.0033 | 0.0019±0.0003 | 0.0002±0      |
| Hybrid 43        | 0.0153±0.0048 | 0.0003±0.0001 | 0.0034±0.0013 | 0.106±0.0285  | 0.0042±0.0023 | 0.0031±0.0003 | 0.0055±0.0036 | 0.0143±0.0037 | 0.003±0.0007  | 0.0002±0.0001 |
| Hybrid 8         | 0.0096±0.0016 | 0.0001±0      | 0.0021±0.0014 | 0.0655±0.0176 | 0.0023±0.0014 | 0.0022±0.0005 | 0.0032±0.0016 | 0.006±0.0028  | 0.0015±0.0002 | 0.0002±0      |
| Hybrid 9         | 0.0096±0.0036 | 0.0002±0.0001 | 0.0016±0.0008 | 0.0505±0.0172 | 0.0026±0.0015 | 0.0025±0.0003 | 0.0038±0.0022 | 0.0063±0.0021 | 0.002±0.0006  | 0.0002±0      |

**Supplementary Table 2 Continued: Free Amino Acid Values (g/100g) in Raw Kernel Flour.** Free amino acid values of all twenty amino acids are recorded. Standard deviations were calculated by two-six biological replications, dependent on genotype.



|                       | Hybrid | Germination Rate | Days to Pollinating | Rot Susceptibility | Number of Ears Harvested | Ear Length | Number of Rows per Ear | Ear Weight | Kernel Size | Vitreous ness Level | Hundred Grain Weight | Pop-Ability | Expansion Volume |
|-----------------------|--------|------------------|---------------------|--------------------|--------------------------|------------|------------------------|------------|-------------|---------------------|----------------------|-------------|------------------|
|                       | 1      | -0.037           | 2.076               | -0.022             | -1.142                   | -3.261     | -1.841                 | -18.283    | 10.831      | 0.855               | -1.686               | 0.016       | 94.932           |
|                       | 2      | -0.270           | 2.976               | 0.024              | -4.236                   | -1.642     | -2.027                 | -25.041    | 16.319      | 0.395               | -2.060               | 0.005       | 99.905           |
|                       | 3      | 0.140            | -1.004              | 0.053              | 0.081                    | -1.501     | -0.167                 | -5.694     | 2.639       | -0.595              | -0.528               | -0.002      | -8.857           |
|                       | 4      | 0.097            | 1.163               | 0.036              | 0.297                    | -1.666     | -0.034                 | -3.716     | 3.886       | -0.025              | -0.727               | 0.002       | -17.113          |
|                       | 5      | -0.078           | 3.825               | 0.028              | -2.221                   | -4.573     | -2.370                 | -29.536    | 27.055      | 0.316               | -2.879               | 0.017       | 112.069          |
|                       | 6      | -0.510           | 1.422               | -0.013             | -5.603                   | -2.622     | -1.195                 | -2.570     | -1.981      | -0.074              | 0.049                | 0.006       | 3.366            |
|                       | 7      | 0.104            | 2.304               | -0.049             | 1.089                    | -2.909     | -0.581                 | -14.350    | 16.520      | -0.106              | -2.071               | 0.010       | 52.473           |
|                       | 8      | 0.160            | -1.797              | -0.047             | 1.808                    | 2.376      | 0.546                  | 9.909      | -2.967      | 0.903               | 0.270                | 0.010       | 28.098           |
|                       | 9      | 0.128            | -0.472              | 0.019              | 0.801                    | 2.345      | 0.621                  | 8.096      | -1.805      | 0.819               | 0.111                | 0.020       | 71.737           |
|                       | 10     | 0.202            | -0.810              | 0.020              | 0.945                    | -1.237     | 0.223                  | -6.276     | 5.986       | -0.908              | -0.947               | -0.003      | -59.179          |
|                       | 11     | 0.197            | 0.175               | 0.067              | 1.089                    | -1.711     | -0.997                 | -7.679     | 0.038       | -0.166              | -0.245               | -0.059      | -100.851         |
|                       | 12     | 0.114            | 2.418               | 0.022              | 0.153                    | -4.015     | -2.575                 | -23.254    | 10.553      | 0.382               | -1.495               | 0.006       | 85.890           |
|                       | 13     | 0.061            | 3.368               | -0.010             | 0.657                    | -1.715     | -1.782                 | -19.941    | 9.818       | 0.198               | -1.264               | 0.015       | 53.259           |
|                       | 14     | 0.135            | -0.852              | 0.078              | 0.585                    | -1.687     | -0.293                 | -7.342     | 2.226       | -1.077              | -0.491               | -0.004      | -18.292          |
|                       | 15     | 0.165            | 0.517               | 0.063              | 1.376                    | -3.159     | 0.116                  | -9.107     | 9.699       | -0.209              | -1.124               | -0.008      | -10.429          |
|                       | 16     | -0.027           | 3.140               | -0.004             | -1.142                   | -3.597     | -2.476                 | -29.301    | 31.190      | 0.791               | -3.200               | 0.022       | 119.700          |
|                       | 17     | 0.162            | 1.962               | 0.027              | 1.017                    | -2.324     | -0.533                 | -8.613     | -0.029      | -0.077              | -0.210               | 0.013       | 28.491           |
|                       | 18     | 0.129            | 2.342               | 0.013              | 0.009                    | -2.745     | -0.925                 | -16.935    | 15.242      | 0.043               | -1.838               | 0.021       | 74.095           |
|                       | 19     | 0.141            | -2.677              | 0.035              | 2.168                    | 2.127      | -0.225                 | 9.178      | -6.284      | 0.668               | 0.716                | 0.015       | 35.934           |
|                       | 20     | 0.157            | -2.487              | 0.028              | 1.520                    | 2.637      | 0.204                  | 6.771      | -5.455      | 0.717               | 0.710                | 0.019       | 50.114           |
|                       | 21     | 0.046            | -0.624              | 0.030              | 0.009                    | -1.884     | -0.298                 | -6.388     | 1.070       | -0.642              | -0.267               | -0.003      | -29.693          |
|                       | 22     | 0.139            | -0.244              | 0.120              | 0.585                    | -1.528     | -0.645                 | -4.402     | -2.503      | 0.044               | 0.265                | -0.038      | -56.820          |
|                       | 23     | 0.040            | -1.042              | 0.002              | 1.664                    | 0.943      | -0.725                 | 12.595     | -10.644     | -0.262              | 1.591                | -0.032      | -30.873          |
|                       | 24     | -0.168           | -0.092              | -0.013             | -0.782                   | 1.795      | -0.287                 | 9.770      | -6.910      | -0.378              | 0.970                | -0.013      | -34.411          |
|                       | 25     | 0.051            | -1.156              | -0.075             | 1.880                    | 1.637      | 1.413                  | 16.628     | -7.374      | -0.191              | 0.937                | -0.001      | -39.129          |
|                       | 26     | 0.029            | 0.479               | -0.055             | 0.081                    | 1.068      | 1.838                  | 17.377     | -8.543      | -0.436              | 1.094                | -0.010      | -54.068          |
|                       | 27     | -0.138           | -1.427              | -0.101             | -0.830                   | 2.318      | -0.661                 | 7.919      | -8.657      | 0.646               | 1.153                | -0.003      | -8.464           |
|                       | 28     | 0.030            | -2.826              | 0.072              | 1.376                    | 2.702      | -0.586                 | 9.367      | -6.365      | 0.929               | 0.668                | 0.014       | 48.935           |
|                       | 29     | -0.037           | -0.320              | -0.023             | -0.494                   | 3.106      | 0.492                  | 16.712     | -15.752     | -0.652              | 2.548                | -0.012      | -76.084          |
|                       | 30     | 0.055            | 0.897               | -0.001             | 0.729                    | 2.061      | -0.362                 | 4.791      | -2.810      | -0.246              | 0.176                | -0.009      | 2.151            |
|                       | 31     | -0.205           | -0.814              | -0.075             | -1.286                   | 1.223      | 0.849                  | -6.119     | 4.893       | 0.091               | -0.657               | 0.018       | -14.754          |
|                       | 32     | -0.006           | -0.510              | -0.079             | 0.801                    | 1.141      | 1.718                  | 18.423     | -9.479      | -0.355              | 1.244                | -0.014      | -69.400          |
|                       | 33     | -0.054           | -0.890              | -0.113             | 0.873                    | 3.313      | 1.427                  | 18.797     | -9.928      | 0.213               | 1.740                | -0.046      | -109.500         |
|                       | 34     | 0.093            | -2.753              | 0.034              | 1.520                    | 1.175      | 0.204                  | 11.252     | -11.778     | -1.359              | 1.912                | -0.017      | -67.435          |
|                       | 35     | -0.153           | 0.061               | 0.016              | -0.998                   | 0.505      | 0.920                  | 8.333      | -5.632      | -1.206              | 0.859                | -0.028      | -76.084          |
|                       | 36     | -0.268           | -0.966              | -0.025             | -1.646                   | 1.139      | 1.787                  | 7.619      | -4.281      | -0.635              | 0.503                | 0.014       | -24.976          |
|                       | 37     | -0.247           | 0.669               | 0.017              | -1.430                   | -0.497     | 1.475                  | 2.915      | -2.226      | -0.224              | 0.206                | 0.003       | -21.830          |
|                       | 38     | 0.144            | -2.411              | 0.065              | 1.448                    | 1.603      | 0.151                  | 5.027      | -4.594      | 1.098               | 0.312                | 0.023       | 57.977           |
|                       | 39     | -0.121           | -0.481              | -0.020             | -0.782                   | 1.752      | 0.140                  | 1.746      | -2.834      | 0.956               | 0.154                | 0.022       | 68.198           |
|                       | 40     | -0.185           | 0.061               | -0.036             | -1.933                   | 1.563      | 1.101                  | 4.903      | -9.084      | -0.349              | 1.252                | 0.012       | -26.155          |
|                       | 41     | -0.079           | -1.194              | -0.017             | -0.351                   | 1.420      | 0.693                  | 5.212      | -4.896      | -0.545              | 0.426                | -0.009      | -15.933          |
|                       | 42     | -0.169           | 0.061               | -0.039             | -1.646                   | 0.571      | 1.405                  | -0.890     | -1.759      | 0.310               | 0.150                | 0.002       | -26.155          |
|                       | 43     | 0.084            | -1.139              | -0.017             | 1.592                    | 1.000      | 2.265                  | 11.506     | -3.534      | 0.006               | 0.360                | -0.006      | -56.820          |
|                       | 44     | -0.048           | -0.928              | -0.036             | 0.369                    | 2.752      | 1.998                  | 20.589     | -9.862      | 0.340               | 1.316                | 0.013       | -34.018          |
| Standard Error        |        | 0.006            | 0.772               | 0.002              | 0.731                    | 1.17       | 0.366                  | 41.73      | 23.967      | 0.0874              | 4.444                | 0.0001      | 862.378          |
| Genetic Repeatability |        | 0.566            | 0.465               | 0.078              | 0.345                    | 0.716      | 0.673                  | 0.728      | 0.676       | 0.684               | 0.683                | 0.201       | 0.582            |

**Supplementary Table 3: Specific Combining Ability (SCA) and genetic repeatability estimates for all recorded traits.** Specific Combining Ability and genetic repeatability estimates were found with ASReml-R software. High SCAs were noted in elite hybrids, shaded in gray. High repeatabilities were calculated for ear length and ear weight.

|                         | Ala             | Arg             | Asx             | Glx             | Gly             | His             | Ile             | Leu             | Lys             | Met             | Phe             | Pro             | Ser             | Thr             | Tyr             | Val             |
|-------------------------|-----------------|-----------------|-----------------|-----------------|-----------------|-----------------|-----------------|-----------------|-----------------|-----------------|-----------------|-----------------|-----------------|-----------------|-----------------|-----------------|
| <b>Popcorn Parent 4</b> | 1.254±<br>0.144 | 0.365±<br>0.061 | 0.807±<br>0.057 | 3.085±<br>0.087 | 1.159±<br>0.076 | 0.451±<br>0.022 | 0.783±<br>0.073 | 2.48±<br>0.194  | 0.206±<br>0.043 | 0.193±<br>0.029 | 0.809<br>±0.033 | 1.291±<br>0.091 | 0.773±<br>0.074 | 0.6±<br>0.071   | 0.486<br>±0.053 | 0.66±<br>0.044  |
| <b>Popcorn Parent 3</b> | 1.056±<br>0.024 | 0.31±<br>0.024  | 0.7±<br>0.031   | 2.591±<br>0.092 | 0.909±<br>0.018 | 0.402±<br>0.009 | 0.659±<br>0.029 | 2.006±<br>0.117 | 0.173±<br>0.017 | 0.196±<br>0.005 | 0.698±<br>0.018 | 1.168±<br>0.06  | 0.667±<br>0.023 | 0.547±<br>0.034 | 0.445±<br>0.031 | 0.555±<br>0.018 |
| <b>Popcorn Parent 1</b> | 1.248±<br>0.037 | 0.379±<br>0.022 | 0.795±<br>0.026 | 3.077±<br>0.165 | 1.089±<br>0.016 | 0.499±<br>0.017 | 0.755±<br>0.053 | 2.388±<br>0.148 | 0.197±<br>0.013 | 0.259±<br>0.035 | 0.788±<br>0.025 | 1.386±<br>0.054 | 0.783±<br>0.048 | 0.616±<br>0.027 | 0.515±<br>0.043 | 0.65±<br>0.026  |
| <b>Popcorn Parent 2</b> | 0.991±<br>0.1   | 0.295±<br>0.021 | 0.662±<br>0.04  | 2.58±<br>0.139  | 1.003±<br>0.107 | 0.391±<br>0.018 | 0.642±<br>0.038 | 1.978±<br>0.152 | 0.201±<br>0.028 | 0.182±<br>0.015 | 0.707±<br>0.035 | 1.146±<br>0.052 | 0.642±<br>0.047 | 0.484±<br>0.054 | 0.425±<br>0.024 | 0.527±<br>0.029 |
| <b>QPP Hybrid 20</b>    | 0.752±<br>0.052 | 0.514±<br>0.038 | 0.852±<br>0.122 | 2.234±<br>0.188 | 0.862±<br>0.139 | 0.552±<br>0.024 | 0.54±<br>0.038  | 1.342±<br>0.099 | 0.402±<br>0.024 | 0.128±<br>0.006 | 0.603±<br>0.04  | 1.128±<br>0.05  | 0.59±<br>0.032  | 0.527±<br>0.029 | 0.322±<br>0.037 | 0.628±<br>0.036 |
| <b>QPP Hybrid 25</b>    | 0.709±<br>0.066 | 0.494±<br>0.078 | 0.973±<br>0.219 | 2.24±<br>0.171  | 0.936±<br>0.127 | 0.553±<br>0.054 | 0.501±<br>0.047 | 1.164±<br>0.086 | 0.37±<br>0.065  | 0.135±<br>0.023 | 0.532±<br>0.043 | 1.113±<br>0.079 | 0.556±<br>0.066 | 0.508±<br>0.039 | 0.294±<br>0.045 | 0.609±<br>0.061 |
| <b>QPP Hybrid 28</b>    | 0.872±<br>0.079 | 0.558±<br>0.072 | 0.829±<br>0.119 | 2.57±<br>0.229  | 0.935±<br>0.151 | 0.614±<br>0.027 | 0.622±<br>0.051 | 1.581±<br>0.164 | 0.358±<br>0.061 | 0.137±<br>0.012 | 0.672±<br>0.069 | 1.297±0.067     | 0.653±<br>0.05  | 0.571±<br>0.041 | 0.39±<br>0.061  | 0.708±<br>0.048 |
| <b>QPP Hybrid 38</b>    | 0.713±<br>0.03  | 0.553±<br>0.057 | 0.778±<br>0.11  | 2.189±<br>0.103 | 1.282±<br>0.137 | 0.644±<br>0.05  | 0.517±<br>0.025 | 1.359±<br>0.058 | 0.371±<br>0.04  | 0.117±<br>0.011 | 0.555±<br>0.029 | 1.26±<br>0.049  | 0.554±<br>0.04  | 0.519±<br>0.031 | 0.338±<br>0.025 | 0.617±<br>0.035 |
| <b>QPP Hybrid 43</b>    | 0.758±<br>0.087 | 0.63±<br>0.155  | 0.915±<br>0.248 | 2.348±<br>0.32  | 1.292±<br>0.096 | 0.641±<br>0.094 | 0.546±<br>0.086 | 1.326±<br>0.175 | 0.42±<br>0.077  | 0.148±<br>0.025 | 0.559±<br>0.058 | 1.269±<br>0.121 | 0.599±<br>0.099 | 0.571±<br>0.068 | 0.357±<br>0.044 | 0.651±<br>0.097 |

**Supplementary Table 4: Protein-Bound Amino Acid Levels (g/100g) in Air Popped Flakes.** Protein-bound amino acid values of sixteen amino acids in air popped flakes are recorded. Aspartate and asparagine (Asx), glutamine and glutamate (Glx), Serine, and Tryptophan are destroyed during acidic hydrolysis, the procedure used for amino acid quantification. Only five QPP hybrids and four popcorn parents were tested with air popping. Standard deviations were calculated by four biological replications.

|                         | Ala                     | Arg   | Asx   | Glx                     | Gly   | His   | Ile   | Leu               | Lys                | Met                     | Phe                     | Pro               | Ser   | Thr   | Tyr   | Val   |
|-------------------------|-------------------------|-------|-------|-------------------------|-------|-------|-------|-------------------|--------------------|-------------------------|-------------------------|-------------------|-------|-------|-------|-------|
| <b>Popcorn Parent 1</b> | 1.314±0.336±0.838±0.085 | 0.039 | 0.091 | 3.185±1.101±0.502±0.264 | 0.122 | 0.04  | 0.091 | 2.555±0.823±2.024 | 0.176±0.274±0.024  | 0.821±1.431±0.025       | 0.776±0.612±0.071       | 0.537±0.679±0.115 | 0.059 | 0.068 | 0.08  | 0.066 |
| <b>Popcorn Parent 2</b> | 0.967±0.249±0.614±0.054 | 0.031 | 0.073 | 2.485±0.843±0.38±0.163  | 0.092 | .027  | 0.062 | 1.917±0.603±1.123 | 0.155±0.171±0.014  | 0.668±1.098±0.01        | 0.593±0.451±0.047       | 0.374±0.506±0.056 | 0.058 | 0.041 | 0.043 | 0.044 |
| <b>QPP Hybrid 20</b>    | 0.849±0.504±0.872±0.052 | 0.073 | 0.079 | 2.479±0.911±0.582±0.154 | 0.14  | 0.042 | 0.063 | 1.517±0.357±0.148 | 0.357±0.148±0.062  | 0.662±1.22±0.0632       | 0.565±0.353±0.682±0.059 | 0.042             | 0.063 |       |       |       |
| <b>QPP Hybrid 25</b>    | 0.748±0.466±0.831±0.044 | 0.041 | 0.084 | 2.325±0.982±0.568±0.056 | 0.127 | 0.021 | 0.033 | 1.255±0.313±0.138 | 0.569±1.138±0.057  | 0.558±0.524±0.035       | 0.31±0.64±0.035         |                   |       |       |       |       |
| <b>QPP Hybrid 28</b>    | 0.715±0.506±0.688±0.075 | 0.062 | 0.119 | 2.195±1.196±0.658±0.168 | 0.017 | 0.031 | 0.06  | 1.345±0.287±0.117 | 0.527±1.2±0.0537   | 0.502±0.32±0.0596       | 0.056                   | 0.056             |       |       |       |       |
| <b>QPP Hybrid 38</b>    | 0.695±0.558±0.788±0.054 | 0.059 | 0.108 | 2.099±1.197±0.593±0.136 | 0.034 | 0.061 | 0.028 | 1.268±0.334±0.118 | 0.53±0.163±0.096   | 0.545±0.509±0.034       | 0.317±0.591±0.034       |                   |       |       |       |       |
| <b>QPP Hybrid 43</b>    | 0.726±0.577±0.869±0.077 | 0.024 | 0.114 | 2.276±1.253±0.627±0.222 | 0.054 | 0.06  | 0.046 | 1.301±0.353±0.139 | 0.538±1.216±0.0548 | 0.532±0.331±0.622±0.019 | 0.045                   | 0.062             |       |       |       |       |

**Supplementary Table 5: Protein-Bound Amino Acid Levels (g/100g) in Microwaved Popped Flakes.** Protein-bound amino acid values of sixteen amino acids in microwave-popped flakes are recorded. Aspartate and asparagine (Asx), glutamine and glutamate (Glx), Serine, and Tryptophan are destroyed during acidic hydrolysis, the procedure used for amino acid quantification. Only five QPP hybrids and two popcorn parents were tested with air popping. Standard deviations were calculated by four biological replications.

|                         | Ala              | Arg             | Asx             | Glx             | Gly              | His             | Ile             | Leu             | Lys             | Met              | Phe             | Pro             | Ser             | Thr             | Tyr             | Val             |
|-------------------------|------------------|-----------------|-----------------|-----------------|------------------|-----------------|-----------------|-----------------|-----------------|------------------|-----------------|-----------------|-----------------|-----------------|-----------------|-----------------|
| <b>Popcorn Parent 1</b> | 0.897±<br>0.195  | 0.267±<br>0.021 | 0.601±<br>0.083 | 2.269±<br>0.389 | 0.773±<br>0.172  | 0.364±<br>0.044 | 0.529±<br>0.114 | 1.751±<br>0.358 | 0.188±<br>0.022 | 0.179±<br>0.046  | 0.625±<br>0.102 | 1.067±<br>0.176 | 0.575±<br>0.101 | 0.459±<br>0.077 | 0.38±0.<br>089  | 0.48±0.<br>076  |
| <b>Popcorn Parent 2</b> | 0.855±<br>0.146  | 0.296±<br>0.073 | 0.635±<br>0.158 | 2.187±<br>0.422 | 0.745±<br>0.187  | 0.351±<br>0.076 | 0.548±<br>0.136 | 1.662±<br>0.338 | 0.23±0.<br>082  | 0.152±<br>0.033  | 0.63±0.<br>116  | 0.969±<br>0.17  | 0.571±<br>0.115 | 0.454±<br>0.099 | 0.354±<br>0.108 | 0.503±<br>0.116 |
| <b>QPP Hybrid 20</b>    | 0.611±0.<br>.078 | 0.379±<br>0.025 | 0.672±<br>0.101 | 1.8±<br>0.24    | 0.77±<br>0.08    | 0.474±<br>0.05  | 0.428±<br>0.046 | 1.076±<br>0.154 | 0.266±<br>0.018 | 0.098±<br>0.007  | 0.487±<br>0.06  | 0.945±<br>0.103 | 0.475±<br>0.064 | 0.414±<br>0.035 | 0.269±<br>0.018 | 0.519±<br>0.05  |
| <b>QPP Hybrid 25</b>    | 0.543±<br>0.051  | 0.363±<br>0.097 | 0.686±<br>0.12  | 1.78±<br>0.192  | 0.645±<br>0.098  | 0.481±<br>0.059 | 0.391±<br>0.047 | 0.927±<br>0.078 | 0.28±0.<br>05   | 0.097±<br>0.01   | 0.425±<br>0.049 | 0.894±<br>0.089 | 0.426±<br>0.06  | 0.398±<br>0.037 | 0.239±<br>0.038 | 0.503±<br>0.058 |
| <b>QPP Hybrid 28</b>    | 0.565±<br>0.105  | 0.485±<br>0.135 | 0.586±<br>0.088 | 1.675±<br>0.224 | 1.014±<br>0.151  | 0.499±<br>0.036 | 0.396±<br>0.058 | 0.989±<br>0.151 | 0.273±<br>0.027 | 0.088±<br>0.014  | 0.434±<br>0.062 | 0.935±<br>0.083 | 0.433±<br>0.053 | 0.399±<br>0.027 | 0.245±<br>0.039 | 0.488±<br>0.053 |
| <b>QPP Hybrid 38</b>    | 0.62±0.<br>088   | 0.487±<br>0.013 | 0.677±<br>0.055 | 1.807±<br>0.324 | 1.117±0.<br>.107 | 0.529±<br>0.098 | 0.437±<br>0.057 | 1.123±<br>0.238 | 0.264±<br>0.016 | 0.102±<br>0.012  | 0.481±<br>0.056 | 0.983±<br>0.225 | 0.496±<br>0.05  | 0.448±<br>0.041 | 0.29±0.<br>067  | 0.529±<br>0.054 |
| <b>QPP Hybrid 43</b>    | 0.662±<br>0.023  | 0.567±<br>0.061 | 0.823±<br>0.191 | 2.007±<br>0.155 | 1.141±<br>0.076  | 0.589±<br>0.048 | 0.466±<br>0.021 | 1.152±<br>0.059 | 0.345±<br>0.077 | 0.117±0.<br>.006 | 0.493±<br>0.022 | 1.089±<br>0.079 | 0.509±<br>0.042 | 0.495±<br>0.048 | 0.26±0.<br>016  | 0.561±<br>0.034 |

**Supplementary Table 6: Protein-Bound Amino Acid Levels (g/100g) in Oil Popped Flakes.** Protein-bound amino acid values of sixteen amino acids in oil-popped flakes are recorded. Aspartate and asparagine (Asx), glutamine and glutamate (Glx), serine, and tryptophan are destroyed during acidic hydrolysis, the procedure used for protein-bound amino acid quantification. Only five QPP hybrids and two popcorn parents were tested with air popping. Standard deviations were calculated by four biological replications.

|                         | Ala                   | Arg                  | Asn                  | Asp                  | Gln                         | Glu                       | Gly                  | His                   | Ile                           | Leu                         | Lys                        | Met                         | Phe                         | Pro                  | Ser                        | Trp                          | Thr                        | Tyr                         | Val                           | Cys                          |
|-------------------------|-----------------------|----------------------|----------------------|----------------------|-----------------------------|---------------------------|----------------------|-----------------------|-------------------------------|-----------------------------|----------------------------|-----------------------------|-----------------------------|----------------------|----------------------------|------------------------------|----------------------------|-----------------------------|-------------------------------|------------------------------|
| <b>Popcorn Parent 4</b> | 0.000806<br>±0.00028  | 0.00121±<br>0.000196 | 0.00133±<br>0.00111  | 0.000792<br>±0.0003  |                             | 0.000194<br>±0.00010      | 0.000823<br>±0.00041 | 0.000599<br>±0.00015  | 0.0000868<br>±0.00000<br>173  | 0.0000288<br>±0.00004<br>98 | 0.000642<br>±0.00024       |                             | 0.000109<br>±0.00000<br>218 | 0.00137±<br>0.000914 | 0.000278<br>±0.00006<br>62 | 0.000135<br>±0.00000<br>269  | 0.000211<br>±0.00009<br>61 | 0.0000791<br>±0.00006<br>85 | 0.0000257<br>±0.00004<br>45   | 0.0000539<br>±0.00004<br>67  |
| <b>Popcorn Parent 3</b> | 0.00119±<br>0.0000386 | 0.00128±<br>0.000163 | 0.0014±0.<br>000284  | 0.00331±<br>0.000461 |                             | 0.000795<br>±0.00015<br>1 | 0.00196±<br>0.0019   | 0.00113±<br>0.0000851 | 0.000085<br>±0.00000<br>0498  | 0.000114<br>±0.00005        | 0.00115±<br>0.000369       |                             | 0.00025±<br>0.0000634       | 0.00996±<br>0.00355  | 0.000705<br>±0.00016<br>2  | 0.000132<br>±0.00000<br>0775 | 0.00155±<br>0.000955       | 0.000313<br>±0.00006<br>9   | 0.0000759<br>±0.00000<br>0445 | 0.0000522<br>±0.00004<br>52  |
| <b>Popcorn Parent 1</b> | 0.000764<br>±0.00022  | 0.00149±<br>0.00017  | 0.00472±<br>0.000973 | 0.0022±0.<br>00037   |                             | 0.00067±<br>0.000207      | 0.00146±<br>0.000794 | 0.000013<br>3         | 0.0000666<br>±0.00004<br>44   | 0.0000667<br>±0.00004<br>45 | 0.000738<br>±0.00009<br>11 | 0.0000247<br>±0.00004<br>95 | 0.000111<br>±0.00000<br>172 | 0.00258±<br>0.000852 | 0.000337<br>±0.00010<br>7  | 0.000138<br>±0.00000<br>213  | 0.000141<br>±0.00004<br>13 | 0.000122<br>±0.00000<br>189 | 0.0000596<br>±0.00003<br>97   | 0.0000817<br>±0.00000<br>126 |
| <b>Popcorn Parent 2</b> | 0.000512<br>±0.00012  | 0.00132±<br>0.000171 | 0.00365±<br>0.00201  | 0.00199±<br>0.000666 |                             | 0.0012±0.<br>000591       | 0.00115±<br>0.00059  | 0.000657<br>±0.00021  | 0.0000864<br>±0.00000<br>123  | 0.000753<br>±0.00021        |                            | 0.000109<br>±0.00000<br>155 | 0.00192±<br>0.00114         | 0.000519<br>±0.00012 | 0.000168<br>±0.00006<br>46 | 0.000137<br>±0.00003<br>81   | 0.000239<br>±0.00000<br>34 | 0.0000575<br>±0.00003<br>84 | 0.0000798<br>±0.00000<br>114  |                              |
| <b>QPP Hybrid 20</b>    | 0.00235±<br>0.000557  | 0.00993±<br>0.00437  | 0.0277±0.<br>00573   | 0.0305±0.<br>0109    |                             | 0.0076±0.<br>00541        | 0.00361±<br>0.00244  | 0.00206±<br>0.000355  | 0.00011±<br>0.0000469         | 0.000152<br>±0.00007<br>94  | 0.00314±<br>0.000935       | 0.0000242<br>±0.00004<br>84 | 0.000518<br>±0.00038        | 0.0296±0.<br>0126    | 0.000697<br>±0.00034       | 0.00068±<br>0.000239         | 0.00645±<br>0.00226        | 0.00201±<br>0.000953        | 0.000487<br>±0.00012<br>2     | 0.000221<br>±0.00007<br>29   |
| <b>QPP Hybrid 25</b>    | 0.00536±<br>0.00225   | 0.00833±<br>0.00149  | 0.0337±0.<br>00797   | 0.0581±0.<br>013     | 0.0000712<br>±0.00014       | 0.015±0.0<br>0615         | 0.00647±<br>0.00183  | 0.00318±<br>0.000803  | 0.000321<br>±0.00023          | 0.0015±0.<br>00132          | 0.00457±<br>0.00112        | 0.000244<br>±0.00017        | 0.00245±<br>0.00147         | 0.0421±0.<br>0159    | 0.00458±<br>0.0044         | 0.00133±<br>0.000274         | 0.0103±0.<br>00426         | 0.00936±<br>0.00542         | 0.0021±0.<br>00165            | 0.000237<br>±0.00011         |
| <b>QPP Hybrid 28</b>    | 0.00177±<br>0.000798  | 0.00675±<br>0.00361  | 0.0197±0.<br>00976   | 0.0265±0.<br>0174    |                             | 0.00412±<br>0.00562       | 0.00207±<br>0.00263  | 0.00186±<br>0.000655  | 0.0000427<br>±0.00005<br>27   | 0.000008<br>±0.00000<br>27  | 0.00247±<br>0.000967       |                             | 0.000348<br>±0.00041        | 0.0199±0.<br>0161    | 0.000636<br>±0.00043       | 0.000433<br>±0.00042         | 0.00411±<br>0.00427        | 0.00148±<br>0.00159         | 0.000287<br>±0.00026          | 0.000198<br>±0.00015         |
| <b>QPP Hybrid 38</b>    | 0.00234±<br>0.000545  | 0.00481±<br>0.0026   | 0.0244±0.<br>00603   | 0.034±0.0<br>107     |                             | 0.00415±<br>0.00179       | 0.00256±<br>0.00184  | 0.00176±<br>0.000496  | 0.0000867<br>±0.000109<br>114 | 0.000000<br>±0.00004<br>39  | 0.00271±<br>0.000944       |                             | 0.000465<br>±0.00029        | 0.0267±0.<br>0123    | 0.000607<br>±0.00023       | 0.000641<br>±0.00017         | 0.00688±<br>0.0029         | 0.00165±<br>0.000541        | 0.000465<br>±0.00011          | 0.000279<br>±0.00015         |
| <b>QPP Hybrid 43</b>    | 0.00402±<br>0.0017    | 0.00738±<br>0.00441  | 0.0259±0.<br>0146    | 0.0376±0.<br>0218    | 0.0000735<br>±0.00009<br>45 | 0.011±0.0<br>105          | 0.00467±<br>0.00392  | 0.00234±<br>0.000952  | 0.000198<br>±0.00017          | 0.000441<br>±0.00060        | 0.00376±<br>0.00228        | 0.000125<br>±0.00019        | 0.00127±<br>0.00116         | 0.0525±0.<br>0181    | 0.00178±<br>0.00193        | 0.000817<br>±0.00040         | 0.0137±0.<br>00617         | 0.00432±<br>0.00275         | 0.00104±<br>0.00109           | 0.000649<br>±0.00044         |

**Supplementary Table 7: Free Amino Acid Levels (g/100g) in Air Popped Flakes.** Free amino acid values of all twenty amino acids are recorded. As shown, all free amino acids substantially decline in abundance after popping. The five elite QPP hybrids and four popcorn parents were popped by air. Standard deviations were calculated by four biological replications of each genotype.

|                         | Ala                               | Arg                              | Asn                               | Asp                               | Gln                                | Glu                                 | Gly                               | His                               | Ile                                 | Leu                                 | Lys                               | Met                                 | Phe                                 | Pro                               | Ser                                | Trp                                 | Thr                                 | Tyr                                 | Val                               | Cys                                 |
|-------------------------|-----------------------------------|----------------------------------|-----------------------------------|-----------------------------------|------------------------------------|-------------------------------------|-----------------------------------|-----------------------------------|-------------------------------------|-------------------------------------|-----------------------------------|-------------------------------------|-------------------------------------|-----------------------------------|------------------------------------|-------------------------------------|-------------------------------------|-------------------------------------|-----------------------------------|-------------------------------------|
| <b>Popcorn Parent 1</b> | 0.0009482<br>463±0.000<br>2365559 | 0.0017418<br>48±0.0004<br>865403 | 0.0052037<br>587±0.002<br>0342478 | 0.0022507<br>094±0.000<br>7099502 | 0±0                                | 0.0003721<br>632±0.000<br>1004849   | 0.0018393<br>288±0.000<br>8881289 | 0.0007413<br>003±0.000<br>1857273 | 0.0000224<br>9914±0.00<br>004499828 | 0.0000224<br>6062±0.00<br>004492123 | 0.0008330<br>224±0.000<br>2889226 | 0.0000242<br>534±0.000<br>04844481  | 0.0001111<br>672±0.001<br>002824104 | 0.00037565<br>253±0.000<br>144277 | 0.0002834<br>685±0.000<br>06064005 | 0.0001042<br>72±0.0000<br>06952621  | 0.0002011<br>0559±0.00<br>8390191   | 0.0000925<br>1031±0.00<br>006168268 | 0.0000598<br>003988149            | 0.0000815<br>2643±0.00<br>000207136 |
| <b>Popcorn Parent 2</b> | 0.0004314<br>31±0.0001<br>754707  | 0.0011925<br>1±0.00022<br>72991  | 0.0009401<br>704±0.000<br>2164053 | 0.0007320<br>231±0.000<br>1078965 | 0±0                                | 0.0001904<br>881±0.000<br>002713075 | 0.0005427<br>041±0.000<br>6295066 | 0.0005418<br>658±0.000<br>1880436 | 0±0                                 | 0.0000638<br>5784±0.00<br>004258655 | 0.0005316<br>34±0.0001<br>499558  | 0±0                                 | 0.0001069<br>351±0.000<br>001523051 | 0.0006483<br>133±0.000<br>5851235 | 0.0002383<br>546±0.000<br>04142166 | 0.0001322<br>075±0.000<br>001882999 | 0.0000771<br>1189±0.00<br>000109829 | 0.0000882<br>0921±0.00<br>005882639 | 0±0                               | 0.0000784<br>3248±0.00<br>000111709 |
| <b>QPP Hybrid 20</b>    | 0.0026273<br>338±0.000<br>5253412 | 0.0052710<br>28±0.0009<br>995258 | 0.0236457<br>545±0.004<br>3510332 | 0.0333104<br>174±0.006<br>6603816 | 0±0                                | 0.0024168<br>42±0.0013<br>0196      | 0.0022047<br>871±0.001<br>5269503 | 0.0019492<br>611±0.000<br>1685865 | 0.0001074<br>379±0.000<br>04478807  | 0.0002569<br>593±0.000<br>09933126  | 0.0023867<br>759±0.000<br>2357523 | 0±0                                 | 0.0006469<br>428±0.000<br>2638239   | 0.0241894<br>477±0.007<br>442605  | 0.0007720<br>446±0.000<br>2609134  | 0.0005334<br>992±0.000<br>1889074   | 0.0047557<br>81±0.0017<br>10336     | 0.0027793<br>87±0.0006<br>441274    | 0.0004977<br>861±0.000<br>1606601 | 0.0001584<br>233±0.000<br>06633965  |
| <b>QPP Hybrid 25</b>    | 0.0045106<br>601±0.002<br>4204423 | 0.0061511<br>39±0.0019<br>706678 | 0.0261335<br>466±0.007<br>1172068 | 0.0394566<br>982±0.013<br>7240549 | 0.0000475<br>3136±0.00<br>00548916 | 0.0028958<br>854±0.001<br>870876    | 0.0029132<br>709±0.001<br>264521  | 0.0023100<br>025±0.000<br>7745874 | 0.0001692<br>952±0.000<br>2281432   | 0.0008056<br>195±0.000<br>959592    | 0.0029598<br>845±0.000<br>9597532 | 0.0001446<br>011±0.000<br>1659447   | 0.0014719<br>689±0.001<br>014932    | 0.0242898<br>97±0.0042<br>562222  | 0.0028388<br>085±0.003<br>157153   | 0.0008609<br>623±0.000<br>3166468   | 0.0049458<br>29±0.0015<br>69736     | 0.0056358<br>69±0.0036<br>78759     | 0.0010996<br>31±0.0010<br>51773   | 0.0001375<br>024±0.000<br>03958659  |
| <b>QPP Hybrid 28</b>    | 0.0022881<br>962±0.000<br>4643949 | 0.0031461<br>65±0.0009<br>619635 | 0.0175810<br>897±0.004<br>551998  | 0.0250493<br>416±0.007<br>6961613 | 0±0                                | 0.0018119<br>86±0.0006<br>98582     | 0.0027110<br>223±0.002<br>8351934 | 0.0016151<br>557±0.000<br>4456378 | 0.0000657<br>1855±0.00<br>004389156 | 0.0001755<br>595±0.000<br>1256886   | 0.0022014<br>835±0.000<br>7000656 | 0.0000252<br>8983±0.00<br>005057966 | 0.0005790<br>401±0.000<br>4761225   | 0.0138389<br>265±0.004<br>8636911 | 0.0008664<br>472±0.000<br>8493801  | 0.0004778<br>727±0.000<br>1751826   | 0.0031735<br>39±0.0015<br>45485     | 0.0017192<br>9±0.00111<br>8404      | 0.0004122<br>344±0.000<br>2708196 | 0.0001418<br>729±0.000<br>04030057  |
| <b>QPP Hybrid 38</b>    | 0.0020741<br>728±0.000<br>7131781 | 0.0035095<br>22±0.0014<br>794624 | 0.0231666<br>703±0.008<br>1097997 | 0.0265255<br>607±0.012<br>4497166 | 0±0                                | 0.0021857<br>841±0.001<br>273317    | 0.0013758<br>317±0.001<br>0168604 | 0.0015060<br>134±0.000<br>4030024 | 0.0000856<br>4974±0.00<br>000160956 | 0.0001074<br>94±0.0000<br>8178895   | 0.0021156<br>913±0.000<br>5635579 | 0±0                                 | 0.0004596<br>332±0.000<br>2973852   | 0.0155259<br>675±0.006<br>0488209 | 0.0005322<br>905±0.000<br>3029079  | 0.0004681<br>73±0.0001<br>38271     | 0.0036566<br>42±0.0016<br>46911     | 0.0015146<br>08±0.0009<br>443404    | 0.0002495<br>89±0.0001<br>314453  | 0.0001388<br>724±0.000<br>04101482  |
| <b>QPP Hybrid 43</b>    | 0.0054818<br>223±0.003<br>260012  | 0.0063161<br>67±0.0027<br>925839 | 0.0264189<br>24±0.0116<br>961777  | 0.0374209<br>989±0.022<br>0457084 | 0.0002341<br>987±0.000<br>4683974  | 0.0086145<br>505±0.012<br>31544     | 0.0031117<br>14±0.0032<br>355611  | 0.0026129<br>592±0.001<br>4820626 | 0.0001697<br>118±0.000<br>1180368   | 0.0004661<br>569±0.000<br>4436924   | 0.0039654<br>829±0.000<br>1068802 | 0.0001680<br>26±0.0009<br>2261091   | 0.0013354<br>458±0.025<br>928845    | 0.0406693<br>253±0.002<br>2109382 | 0.0021879<br>966±0.000<br>17686    | 0.0009253<br>66±0.0069<br>5606712   | 0.0093394<br>66±0.0030<br>71784     | 0.0046027<br>06±0.0030<br>60331     | 0.0010957<br>81±0.0011<br>52142   | 0.0000391<br>1748±0.00<br>004517136 |

**Supplementary Table 8: Free Amino Acid Levels (g/100g) in Microwave Popped Flakes.** Free amino acid values of all twenty amino acids in microwave-popped flakes are recorded. As shown, all free amino acids substantially decline in abundance after popping. The five elite hybrids and two popcorn parents were popped with microwave and oil popping methods. Standard deviations were calculated by four biological replications of each genotype.

|                  | Ala      | Arg       | Asn       | Asp       | Gln       | Glu       | Gly       | His       | Ile       | Leu       | Lys       | Met       | Phe       | Pro       | Ser       | Trp       | Thr       | Tyr       | Val       | Cys       |
|------------------|----------|-----------|-----------|-----------|-----------|-----------|-----------|-----------|-----------|-----------|-----------|-----------|-----------|-----------|-----------|-----------|-----------|-----------|-----------|-----------|
| Popcorn Parent 1 | 0.000605 | 0.0013612 | 0.0075552 | 0.0020541 |           | 0.0008027 | 0.0010705 | 0.0006586 |           | 0.0000651 | 0.0007262 | 0.0001959 | 0.0001093 | 0.0032155 | 0.0002608 | 0.0001351 | 0.0001193 | 0.0001199 | 0.0000775 | 0.0000801 |
|                  | 5715±0.0 | 82±0.0003 | 73±0.0013 | 6±0.00047 |           | 696±0.000 | 21±0.0008 | 571±0.000 |           | 3198±0.00 | 074±0.000 | 22±0.0001 | 286±0.000 | 498±0.000 | 39±0.0000 | 667±0.000 | 118±0.000 | 18±0.0000 | 3404±0.00 | 88±0.0000 |
|                  | 00089926 | 79367     | 26479     | 04377     | 0±0       | 1185045   | 517239    | 1731321   | 0±0       | 00434933  | 1781827   | 364582    | 00315079  | 9254667   | 3583853   | 00389543  | 0796212   | 03455971  | 00022345  | 02310975  |
| Popcorn Parent 2 | 0.000478 | 0.0015033 | 0.0041520 | 0.0010354 |           | 0.0007145 | 0.0012058 | 0.0006785 | 0.0000213 | 0.0000633 | 0.0006798 |           | 0.0001071 | 0.0009911 | 0.0004248 | 0.0000985 | 0.0001731 | 0.0001164 | 0.0000378 | 0.0000588 |
|                  | 017±0.00 | 35±0.0002 | 39±0.0024 | 01±0.0004 |           | 323±0.000 | 14±0.0003 | 01±0.0001 | 6319±0.00 | 0407±0.00 | 674±0.000 |           | 172±0.000 | 009±0.001 | 041±0.000 | 6362±0.00 | 916±0.000 | 347±0.000 | 238±0.000 | 331±0.000 |
|                  | 02365074 | 000403    | 50013     | 524599    | 0±0       | 3522831   | 073448    | 855328    | 00427264  | 00422092  | 1704428   | 0±0       | 00188884  | 300758    | 2161146   | 00657193  | 07290276  | 09468833  | 04367861  | 03924577  |
| QPP Hybrid 20    | 0.001770 | 0.0050627 | 0.0197823 | 0.0273530 |           | 0.0043415 | 0.0027494 | 0.0015724 | 0.0000662 | 0.0002200 | 0.0017294 | 0.0000253 | 0.0006376 | 0.0137838 | 0.0006703 | 0.0005126 | 0.0027059 | 0.0019717 | 0.0003926 | 0.0001214 |
|                  | 4579±0.0 | 79±0.0028 | 65±0.0078 | 54±0.0097 |           | 193±0.002 | 15±0.0012 | 698±0.000 | 9293±0.00 | 694±0.000 | 353±0.000 | 7585±0.00 | 837±0.000 | 543±0.005 | 452±0.000 | 073±0.000 | 333±0.001 | 565±0.000 | 669±0.000 | 359±0.000 |
|                  | 00349768 | 149051    | 90235     | 435045    | 0±0       | 6988147   | 870895    | 3871151   | 00442062  | 09025278  | 6078962   | 00507517  | 2970466   | 7840178   | 3229067   | 2085285   | 501073    | 7426972   | 1716898   | 04748471  |
| QPP Hybrid 25    | 0.004269 | 0.0057931 | 0.0278972 | 0.0430361 | 0.0001874 | 0.0093543 | 0.0049239 | 0.0023030 | 0.0002992 | 0.0013379 | 0.0033823 | 0.0001440 | 0.0019076 | 0.0333032 | 0.0032996 | 0.0011411 | 0.0074640 | 0.0062570 | 0.0013339 | 0.0001618 |
|                  | 0561±0.0 | 4±0.00098 | 33±0.0049 | 81±0.0113 | 414±0.000 | 635±0.002 | 67±0.0020 | 685±0.000 | 667±0.000 | 67±0.0010 | 71±0.0005 | 558±0.000 | 603±0.001 | 687±0.011 | 147±0.002 | 68±0.0002 | 906±0.001 | 388±0.002 | 8±0.00069 | 139±0.000 |
|                  | 00699833 | 02109     | 86444     | 80583     | 2641226   | 863602    | 015564    | 4049921   | 141909    | 49088     | 977175    | 1663501   | 067472    | 3730244   | 578605    | 281071    | 153801    | 253185    | 8569      | 119189    |
| QPP Hybrid 28    | 0.001688 | 0.0042970 | 0.0185201 | 0.0237715 |           | 0.0033776 | 0.0017557 | 0.0014256 | 0.0001063 | 0.0001698 | 0.0019808 |           | 0.0004548 | 0.0207593 | 0.0005275 | 0.0004295 | 0.0034245 | 0.0018163 | 0.0003982 | 0.0000978 |
|                  | 0979±0.0 | 51±0.0006 | 59±0.0033 | 48±0.0121 |           | 91±0.0020 | 29±0.0017 | 385±0.000 | 339±0.000 | 036±0.000 | 56±0.0004 |           | 921±0.000 | 688±0.008 | 476±0.000 | 147±0.000 | 118±0.002 | 766±0.001 | 46±0.0000 | 0602±0.00 |
|                  | 00271718 | 235101    | 25288     | 309901    | 0±0       | 479588    | 553255    | 3213544   | 04304956  | 06898908  | 819294    | 0±0       | 3536305   | 3449688   | 2563255   | 1246762   | 788864    | 34109     | 9454382   | 00747207  |
| QPP Hybrid 38    | 0.001578 | 0.0031190 | 0.0228559 | 0.0251230 |           | 0.0047721 | 0.0030079 | 0.0015691 | 0.0000640 | 0.0001278 | 0.0021699 | 0.0000242 | 0.0005911 | 0.0148574 | 0.0006148 | 0.0004987 | 0.0033889 | 0.0016209 | 0.0003803 | 0.0001575 |
|                  | 6804±0.0 | 74±0.0011 | 92±0.0083 | 42±0.0129 |           | 435±0.003 | 02±0.0017 | 532±0.000 | 2349±0.00 | 75±0.0001 | 272±0.000 | 6179±0.00 | 391±0.000 | 978±0.005 | 385±0.000 | 46±0.0002 | 995±0.001 | 766±0.001 | 437±0.000 | 181±0.000 |
|                  | 00485819 | 731056    | 87709     | 98166     | 0±0       | 3670578   | 312362    | 5538586   | 00426869  | 095665    | 7644188   | 00485236  | 4997597   | 8599485   | 4543317   | 962318    | 750523    | 019124    | 2540361   | 06357525  |
| QPP Hybrid 43    | 0.003149 | 0.0078645 | 0.0268852 | 0.0304050 | 0.0000248 | 0.0067119 | 0.0037956 | 0.0018990 | 0.0001101 | 0.0002207 | 0.0036252 | 0.0000253 | 0.0008606 | 0.0378674 | 0.0009561 | 0.0006847 | 0.0090652 | 0.0030706 | 0.0006703 | 0.0004283 |
|                  | 2882±0.0 | 14±0.0051 | 91±0.0115 | 05±0.0152 | 1154±0.00 | 031±0.006 | 33±0.0026 | 164±0.000 | 307±0.000 | 845±0.000 | 118±0.002 | 3277±0.00 | 107±0.000 | 777±0.026 | 96±0.0011 | 551±0.000 | 053±0.006 | 223±0.002 | 602±0.000 | 841±0.000 |
|                  | 01029297 | 672403    | 74059     | 503882    | 00496231  | 3318403   | 524559    | 8719656   | 08499491  | 2247013   | 5363583   | 00506655  | 7323513   | 2502169   | 45673     | 34193     | 734026    | 085509    | 5682421   | 3642795   |

**Supplementary Table 9: Free Amino Acid Levels (g/100g) in Oil Popped Flakes.** Free amino acid values of all twenty amino acids in oil-popped flakes are recorded. As shown, all free amino acids substantially decline in abundance after popping. The five elite hybrids and two popcorn parents were popped with microwave and oil popping methods. Standard deviations were calculated by four biological replications of each genotype.
